# Supplementary material for: Profiling of Parkin-Binding Partners Using Tandem Affinity Purification
Source: PLoS One. 2013 Nov 11;8(11):e78648. doi: 10.1371/journal.pone.0078648 (PMC3823883; doi:10.1371/journal.pone.0078648)
Supplement: Table S1 — Proteins contained in the datasets listed in Table 1 . (TSV) [file pone.0078648.s003.tsv]

EntrezGeneID	HGNC	IPI	UniprotAC	UniprotID
#WholeCellsNT-293T
7431	VIM	IPI00418471	P08670	VIME_HUMAN
3312	HSPA8	IPI00003865,IPI00037070	P11142	HSP7C_HUMAN
3303	HSPA1A	IPI00304925	P08107	HSP71_HUMAN
3181	HNRNPA2B1	IPI00396378,IPI00414696	P22626	ROA2_HUMAN
3305	HSPA1L	IPI00939442	P34931	HS71L_HUMAN
4747	NEFL	IPI00237671	P07196	NFL_HUMAN
3313	HSPA9	IPI00007765	P38646	GRP75_HUMAN
5052	PRDX1	IPI00000874	Q06830	PRDX1_HUMAN
203068	TUBB	IPI01019113	Q6LC01	Q6LC01_HUMAN
64087	MCCC2	IPI00784044,IPI00789428	Q9HCC0	MCCB_HUMAN
5096	PCCB	IPI00007247	P05166	PCCB_HUMAN
6124	RPL4	IPI00003918	P36578	RL4_HUMAN
10642	IGF2BP1	IPI00008557	Q9NZI8	IF2B1_HUMAN
3178	HNRNPA1	IPI00215965,IPI00465365,IPI00797148	P09651	ROA1_HUMAN
3183	HNRNPC	IPI00216592,IPI00477313,IPI00759596,IPI00759822	P07910	HNRPC_HUMAN
5071	PARK2	IPI00005254,IPI00332282,IPI00332283,IPI00470428,IPI00470429,IPI00984693	O60260	PRKN2_HUMAN
3309	HSPA5	IPI00003362	P11021	GRP78_HUMAN
113457,7278	TUBA3D,TUBA3C	IPI00179709,IPI00218345	Q13748	TBA3C_HUMAN
10492	SYNCRIP	IPI00018140,IPI00402182,IPI00402183,IPI00402184,IPI00402185	O60506	HNRPQ_HUMAN
343069	HNRNPCL1	IPI00027569	O60812	HNRCL_HUMAN
3187	HNRNPH1	IPI00013881	P31943	HNRH1_HUMAN
158078	EEF1A1P5	IPI00472724	Q5VTE0	EF1A3_HUMAN
3190	HNRNPK	IPI00216049,IPI00216746,IPI00807545	P61978	HNRPK_HUMAN
5095	PCCA	IPI00744115,IPI00895869	P05165	PCCA_HUMAN
4000	LMNA	IPI00021405,IPI00216952,IPI00216953	P02545	LMNA_HUMAN
6175	RPLP0	IPI00008530	P05388	RLA0_HUMAN
4741	NEFM	IPI00217507	P07197	NFM_HUMAN
8607	RUVBL1	IPI00021187,IPI00788942	Q9Y265	RUVB1_HUMAN
10856	RUVBL2	IPI00009104	Q9Y230	RUVB2_HUMAN
3329	HSPD1	IPI00784154	P10809	CH60_HUMAN
4001	LMNB1	IPI00217975	P20700	LMNB1_HUMAN
3306	HSPA2	IPI00007702	P54652	HSP72_HUMAN
2521	FUS	IPI00221354,IPI00260715	P35637	FUS_HUMAN
10627	MYL12A	IPI00220573	P19105	ML12A_HUMAN
801	CALM1	IPI00945782	Q96HY3	Q96HY3_HUMAN
51121	RPL26L1	IPI00007144	Q9UNX3	RL26L_HUMAN
6147	RPL23A	IPI00021266	P62750	RL23A_HUMAN
8683	SRSF9	IPI00012340	Q13242	SRSF9_HUMAN
6129	RPL7	IPI00030179	P18124	RL7_HUMAN
23581	CASP14	IPI00013885	P31944	CASPE_HUMAN
4869	NPM1	IPI00220740,IPI00549248	P06748	NPM_HUMAN
302	ANXA2	IPI00418169,IPI00455315	P07355	ANXA2_HUMAN
3189	HNRNPH3	IPI00013877,IPI00216492,IPI00216493,IPI00216494,IPI00216495,IPI00216496	P31942	HNRH3_HUMAN
1629	DBT	IPI00003944	P11182	ODB2_HUMAN
81027	TUBB1	IPI00006510	Q9H4B7	TBB1_HUMAN
27339	PRPF19	IPI00004968	Q9UMS4	PRP19_HUMAN
6950	TCP1	IPI00290566	P17987	TCPA_HUMAN
7203	CCT3	IPI00553185	P49368	TCPG_HUMAN
2547	XRCC6	IPI00644712	P12956	XRCC6_HUMAN
1655	DDX5	IPI00017617	P17844	DDX5_HUMAN
11335	CBX3	IPI00297579	Q13185	CBX3_HUMAN
6182	MRPL12	IPI01015060	P52815	RM12_HUMAN
8363	HIST1H4J	IPI00453473	P62805	H4_HUMAN
6202	RPS8	IPI00645201	Q9BS10	Q9BS10_HUMAN
54927	CHCHD3	IPI00015833	Q9NX63	CHCH3_HUMAN
6137	RPL13	IPI00465361	P26373	RL13_HUMAN
6130	RPL7A	IPI00299573	P62424	RL7A_HUMAN
6194	RPS6	IPI00021840	P62753	RS6_HUMAN
6187	RPS2	IPI00013485	P15880	RS2_HUMAN
1994	ELAVL1	IPI00940851	Q15717	ELAV1_HUMAN
6128	RPL6	IPI00790342	Q02878	RL6_HUMAN
84617	TUBB6	IPI00646779	Q9BUF5	TBB6_HUMAN
1917	EEF1A2	IPI00556204	Q59GP5	Q59GP5_HUMAN
3615	IMPDH2	IPI00291510	P12268	IMDH2_HUMAN
55854	ZC3H15	IPI00000279	Q8WU90	ZC3HF_HUMAN
10236	HNRNPR	IPI00012074,IPI00941649	O43390	HNRPR_HUMAN
9532	BAG2	IPI00000643	O95816	BAG2_HUMAN
539	ATP5O	IPI00007611	P48047	ATPO_HUMAN
6428	SRSF3	IPI00010204	P84103	SRSF3_HUMAN
6136	RPL12	IPI00024933	Q59FI9	Q59FI9_HUMAN
9939	RBM8A	IPI00001757,IPI00216659	Q9Y5S9	RBM8A_HUMAN
221613	HIST1H2AA	IPI00045109	Q96QV6	H2A1A_HUMAN
84284	NTPCR	IPI00031570	Q9BSD7	NTPCR_HUMAN
5304	PIP	IPI00022974	P12273	PIP_HUMAN
3006	HIST1H1C	IPI00217465	P16403	H12_HUMAN
292	SLC25A5	IPI00007188	P05141	ADT2_HUMAN
291	SLC25A4	IPI00022891	P12235	ADT1_HUMAN
6132	RPL8	IPI00012772	P62917	RL8_HUMAN
6426	SRSF1	IPI00215884,IPI00218591,IPI00218592	Q07955	SRSF1_HUMAN
22913	RALY	IPI00011268,IPI00216044	Q9UKM9	RALY_HUMAN
220988	HNRNPA3	IPI00419373,IPI00455134	P51991	ROA3_HUMAN
3184	HNRNPD	IPI00028888,IPI00220683,IPI00220684,IPI00220685	Q14103	HNRPD_HUMAN
2597	GAPDH	IPI00219018	P04406	G3P_HUMAN
5984	RFC4	IPI00017381	P35249	RFC4_HUMAN
56945	MRPS22	IPI00013146	P82650	RT22_HUMAN
9987	HNRPDL	IPI00011274,IPI00045498,IPI00845282	O14979	HNRDL_HUMAN
8531	CSDA	IPI00031801,IPI00219147,IPI00219148	P16989	DBPA_HUMAN
56604	TUBB7P	IPI00018511	Q99867	TBB4Q_HUMAN
84790	TUBA1C	IPI00218343	Q9BQE3	TBA1C_HUMAN
10383	TUBB4B	IPI00007752	Q8IWP6	Q8IWP6_HUMAN
7284	TUFM	IPI00027107	P49411	EFTU_HUMAN
51202	DDX47	IPI00023972	Q9H0S4	DDX47_HUMAN
498	ATP5A1	IPI00440493	P25705	ATPA_HUMAN
5042	PABPC3	IPI00301154	Q9H361	PABP3_HUMAN
10521	DDX17	IPI00651653,IPI00651677,IPI00889541,IPI01022339	Q92841	DDX17_HUMAN
80336	PABPC1L	IPI00556259	Q4VXU2	PAP1L_HUMAN
4670	HNRNPM	IPI00171903,IPI00383296	P52272	HNRPM_HUMAN
#MitoNT-293T
801	CALM1	IPI00075248	P62158	CALM_HUMAN
10128	LRPPRC	IPI00783271	E5KNY5,P42704	LPPRC_HUMAN,E5KNY5_HUMAN
3313	HSPA9	IPI00007765	P38646,D6RJI2,D6RA73	GRP75_HUMAN,D6RJI2_HUMAN,D6RA73_HUMAN
83858	ATAD3B	IPI00045921	Q5T9A4,Q9H834	ATD3B_HUMAN,Q9H834_HUMAN
10383	TUBB2C	IPI00007752	Q96HX0,P68371	TBB2C_HUMAN,Q96HX0_HUMAN
3329	HSPD1	IPI00784154	C9J0S9,Q53QD5,P10809,Q53SE2,E7EXB4,C9JCQ4,C9JL19	CH60_HUMAN,Q53SE2_HUMAN,Q53QD5_HUMAN,C9JCQ4_HUMAN,E7EXB4_HUMAN,C9J0S9_HUMAN,C9JL19_HUMAN
3312	HSPA8	IPI00003865	Q9NZ87,A8K7Q2,E9PLF4,E9PQK7,E9PN89,Q96IS6,E9PPY6,E9PK54,E9PM13,Q96BE0,E9PS65,Q96H53,E9PN25,E9PQQ4,P11142	HSP7C_HUMAN,E9PQK7_HUMAN,A8K7Q2_HUMAN,E9PK54_HUMAN,E9PLF4_HUMAN,Q9NZ87_HUMAN,E9PS65_HUMAN,E9PQQ4_HUMAN,Q96BE0_HUMAN,E9PN25_HUMAN,Q96IS6_HUMAN,E9PPY6_HUMAN,E9PN89_HUMAN,E9PM13_HUMAN,Q96H53_HUMAN
292	SLC25A5	IPI00007188	Q6NVC0,P05141	ADT2_HUMAN,Q6NVC0_HUMAN
7284	TUFM	IPI00027107	P49411	EFTU_HUMAN
30968	STOML2	IPI00334190	Q9UJZ1	STML2_HUMAN
5071	PARK2	IPI00005254	Q6S8G7,O60260,Q5VVX1,Q6Q2I8,Q5XNR7	Q6S8G7_HUMAN,Q5XNR7_HUMAN,PRKN2_HUMAN,Q6Q2I8_HUMAN,Q5VVX1_HUMAN
3303	HSPA1A	IPI00304925	P08107	HSP71_HUMAN
498	ATP5A1	IPI00440493	B4DGW3,P25705,A8K092	B4DGW3_HUMAN,A8K092_HUMAN,ATPA_HUMAN
10165	SLC25A13	IPI00007084	Q9UJS0,Q75KX8	Q75KX8_HUMAN,CMC2_HUMAN
7431	VIM	IPI00418471	P08670	VIME_HUMAN
9868	TOMM70A	IPI00015602	B3KQK0,B4DZ87,O94826,B3KQK5	B3KQK5_HUMAN,TOM70_HUMAN,B4DZ87_HUMAN,B3KQK0_HUMAN
29957	SLC25A24	IPI00337494	Q6NUK1	SCMC1_HUMAN
60	ACTB	IPI00021439	Q9UE89,Q96DE1,B3KWQ3,Q6PJ43,Q1KLZ0,C9JTX5,A5GZ75,E7EVS6,Q562Z7,A4UCT3,P60709,F5GYT4,C9JZR7,Q96FU6,A1E282	Q1KLZ0_HUMAN,A4UCT3_HUMAN,A5GZ75_HUMAN,C9JTX5_HUMAN,Q6PJ43_HUMAN,A1E282_HUMAN,B3KWQ3_HUMAN,Q9UE89_HUMAN,F5GYT4_HUMAN,Q96FU6_HUMAN,ACTB_HUMAN,C9JZR7_HUMAN,E7EVS6_HUMAN,Q562Z7_HUMAN,Q96DE1_HUMAN
55750	AGK	IPI00019353	A4D1U5,Q53H12	AGK_HUMAN,A4D1U5_HUMAN
59	ACTA2	IPI00008603	F6UVQ4,D2JYH4,Q562S2,P62736,B3KPP5,Q5T9N7,B4DUI8	B3KPP5_HUMAN,Q5T9N7_HUMAN,D2JYH4_HUMAN,F6UVQ4_HUMAN,ACTA_HUMAN,B4DUI8_HUMAN,Q562S2_HUMAN
7277	TUBA4A	IPI00007750	C9JDS9,C9JQ00,A8MUB1,P68366,C9JEV8	C9JDS9_HUMAN,C9JQ00_HUMAN,C9JEV8_HUMAN,A8MUB1_HUMAN,TBA4A_HUMAN
55037	PTCD3	IPI00783302	Q96EY7	PTCD3_HUMAN
5250	SLC25A3	IPI00022202	Q6MZF9,Q00325	Q6MZF9_HUMAN,MPCP_HUMAN
56945	MRPS22	IPI00013146	P82650,E9PGX2,Q96Q16	Q96Q16_HUMAN,E9PGX2_HUMAN,RT22_HUMAN
2820	GPD2	IPI00017895	F5GYK7,E7EM56,Q53RD0,P43304,Q53T76	GPDM_HUMAN,E7EM56_HUMAN,Q53T76_HUMAN,F5GYK7_HUMAN,Q53RD0_HUMAN
84790	TUBA1C	IPI00166768	E9PGK3	E9PGK3_HUMAN
3309	HSPA5	IPI00003362	P11021	GRP78_HUMAN
7818	DAP3	IPI00018120	P51398,E2JL21	RT29_HUMAN,E2JL21_HUMAN
203068	TUBB	IPI01019113	P07437	TBB5_HUMAN
3305	HSPA1L	IPI00643152	B4DI54	B4DI54_HUMAN
8540	AGPS	IPI00010349	B7Z3Q4,Q53SN7,Q53SG6,Q53S12,O00116	Q53S12_HUMAN,B7Z3Q4_HUMAN,ADAS_HUMAN,Q53SG6_HUMAN,Q53SN7_HUMAN
7053	TGM3	IPI00300376	Q08188	TGM3_HUMAN
23107	MRPS27	IPI00022002	Q8N6F2,E5RJ73,B4DRT2,Q6PKB3	Q8N6F2_HUMAN,B4DRT2_HUMAN,Q6PKB3_HUMAN,E5RJ73_HUMAN
28919	IGKV2-30	IPI00550731	P06310	KV206_HUMAN
490	ATP2B1	IPI00021695	-	-
10845	CLPX	IPI00008728	O76031	CLPX_HUMAN
9551	ATP5J2	IPI00219291	C9JU26	C9JU26_HUMAN
708	C1QBP	IPI00014230	Q07021	C1QBP_HUMAN
55210	ATAD3A	IPI00295992	D2K8Q1	D2K8Q1_HUMAN
4720	NDUFS2	IPI00025239	B7Z9L2,Q9HC11,Q9HC12,O75306	Q9HC11_HUMAN,NDUS2_HUMAN,Q9HC12_HUMAN,B7Z9L2_HUMAN
345651	ACTBL2	IPI00003269	Q562R1	ACTBL_HUMAN
192111	PGAM5	IPI00063242	-	-
9131	AIFM1	IPI00000690	O95831,Q2QKE4,E9PMA0	E9PMA0_HUMAN,Q2QKE4_HUMAN,AIFM1_HUMAN
3006	HIST1H1C	IPI00217465	A8K4I2,P16403	A8K4I2_HUMAN,H12_HUMAN
6576	SLC25A1	IPI00294159	B4DP62,P53007	B4DP62_HUMAN,TXTP_HUMAN
10240	MRPS31	IPI00294242	Q92665	RT31_HUMAN
28973	MRPS18B	IPI00022316	Q9Y676,B0S7P4	RT18B_HUMAN,B0S7P4_HUMAN
4722	NDUFS3	IPI00025796	O75489,Q9UF24	Q9UF24_HUMAN,NDUS3_HUMAN
4705	NDUFA10	IPI00029561	O95299,Q53QE8,Q53SW4	NDUAA_HUMAN,Q53SW4_HUMAN,Q53QE8_HUMAN
81027	TUBB1	IPI00006510	Q9H4B7	TBB1_HUMAN
280	AMY2B	IPI00021447	C9JWK7,P19961,C9J2Z5	C9JWK7_HUMAN,AMY2B_HUMAN,C9J2Z5_HUMAN
3192	HNRNPU	IPI00479217	B4DLR3,Q7Z4Q5,Q9UEL2	B4DLR3_HUMAN,Q9UEL2_HUMAN,Q7Z4Q5_HUMAN
8363	HIST1H4J	IPI00453473	P62805	H4_HUMAN
509	ATP5C1	IPI00395769	P36542,Q6I9V2,B4DFE6,Q8TAS0,B4DL14	Q6I9V2_HUMAN,B4DL14_HUMAN,ATPG_HUMAN,Q8TAS0_HUMAN,B4DFE6_HUMAN
2597	GAPDH	IPI00219018	E7EPW1,P04406,A4UCT1,Q0QET7,E7EUT4,Q5ZEY3	Q0QET7_HUMAN,E7EPW1_HUMAN,Q5ZEY3_HUMAN,E7EUT4_HUMAN,A4UCT1_HUMAN,G3P_HUMAN
4724	NDUFS4	IPI00011217	O43181	NDUS4_HUMAN
6187	RPS2	IPI00013485	E9PMM9,Q8NI62,O60249,P15880,Q9BSW5	O60249_HUMAN,RS2_HUMAN,Q9BSW5_HUMAN,Q8NI62_HUMAN,E9PMM9_HUMAN
302	ANXA2	IPI00334627	A6NMY6,P07355	AXA2L_HUMAN,ANXA2_HUMAN
6208	RPS14	IPI00026271	P62263	RS14_HUMAN
84263	HSDL2	IPI00031107	B4DWC7	B4DWC7_HUMAN
51081	MRPS7	IPI00006440	Q96Q63,Q9Y2R9	RT07_HUMAN,Q96Q63_HUMAN
4976	OPA1	IPI00006721	Q6PEK6,C9JY58,O60313	Q6PEK6_HUMAN,C9JY58_HUMAN,OPA1_HUMAN
3032	HADHB	IPI00022793	P55084,C9K0M0,C9JEY0,C9JE81	C9JE81_HUMAN,C9JEY0_HUMAN,C9K0M0_HUMAN,ECHB_HUMAN
539	ATP5O	IPI00007611	P48047	ATPO_HUMAN
64960	MRPS15	IPI00550037	D3DPS9,P82914	D3DPS9_HUMAN,RT15_HUMAN
#CytoNT-293T
801	CALM1	IPI00075248	P62158	CALM_HUMAN
7431	VIM	IPI00418471	P08670	VIME_HUMAN
10383	TUBB2C	IPI00007752	Q96HX0,P68371	TBB2C_HUMAN,Q96HX0_HUMAN
3312	HSPA8	IPI00003865	Q9NZ87,A8K7Q2,E9PLF4,E9PQK7,E9PN89,Q96IS6,E9PPY6,E9PK54,E9PM13,Q96BE0,E9PS65,Q96H53,E9PN25,E9PQQ4,P11142	HSP7C_HUMAN,E9PQK7_HUMAN,A8K7Q2_HUMAN,E9PK54_HUMAN,E9PLF4_HUMAN,Q9NZ87_HUMAN,E9PS65_HUMAN,E9PQQ4_HUMAN,Q96BE0_HUMAN,E9PN25_HUMAN,Q96IS6_HUMAN,E9PPY6_HUMAN,E9PN89_HUMAN,E9PM13_HUMAN,Q96H53_HUMAN
3303	HSPA1A	IPI00304925	P08107	HSP71_HUMAN
5071	PARK2	IPI00005254	Q6S8G7,O60260,Q5VVX1,Q6Q2I8,Q5XNR7	Q6S8G7_HUMAN,Q5XNR7_HUMAN,PRKN2_HUMAN,Q6Q2I8_HUMAN,Q5VVX1_HUMAN
7277	TUBA4A	IPI00007750	C9JDS9,C9JQ00,A8MUB1,P68366,C9JEV8	C9JDS9_HUMAN,C9JQ00_HUMAN,C9JEV8_HUMAN,A8MUB1_HUMAN,TBA4A_HUMAN
3192	HNRNPU	IPI00479217	B4DLR3,Q7Z4Q5,Q9UEL2	B4DLR3_HUMAN,Q9UEL2_HUMAN,Q7Z4Q5_HUMAN
154796	AMOT	IPI00163085	E7ERM3,Q4VCS5	AMOT_HUMAN,E7ERM3_HUMAN
4869	NPM1	IPI00220740	E5RI98	E5RI98_HUMAN
203068	TUBB	IPI01019113	P07437	TBB5_HUMAN
3305	HSPA1L	IPI00643152	B4DI54	B4DI54_HUMAN
1655	DDX5	IPI00017617	P17844	DDX5_HUMAN
9782	MATR3	IPI00017297	D6RAY2,D6RBS2,D6RBK5,D6RAM9,D6RCM3,D6R991,B3KM87,D6RB45,Q9H4N1,D6RBI2,D6R9F3,D6R8Z5,D6REK4,D6RE02,P43243	D6RBK5_HUMAN,D6RAM9_HUMAN,D6RBS2_HUMAN,D6R991_HUMAN,D6RCM3_HUMAN,D6R8Z5_HUMAN,D6RAY2_HUMAN,MATR3_HUMAN,D6RE02_HUMAN,B3KM87_HUMAN,D6RB45_HUMAN,D6R9F3_HUMAN,D6RBI2_HUMAN,D6REK4_HUMAN,Q9H4N1_HUMAN
810	CALML3	IPI00216984	P27482	CALL3_HUMAN
84790	TUBA1C	IPI00166768	E9PGK3	E9PGK3_HUMAN
3329	HSPD1	IPI00784154	C9J0S9,Q53QD5,P10809,Q53SE2,E7EXB4,C9JCQ4,C9JL19	CH60_HUMAN,Q53SE2_HUMAN,Q53QD5_HUMAN,C9JCQ4_HUMAN,E7EXB4_HUMAN,C9J0S9_HUMAN,C9JL19_HUMAN
1915	EEF1A1	IPI00940393	P68104	EF1A1_HUMAN
6217	RPS16	IPI00221092	P62249	RS16_HUMAN
302	ANXA2	IPI00334627	A6NMY6,P07355	AXA2L_HUMAN,ANXA2_HUMAN
9092	SART1	IPI00021417	O43290	SNUT1_HUMAN
292	SLC25A5	IPI00007188	Q6NVC0,P05141	ADT2_HUMAN,Q6NVC0_HUMAN
3313	HSPA9	IPI00007765	P38646,D6RJI2,D6RA73	GRP75_HUMAN,D6RJI2_HUMAN,D6RA73_HUMAN
4082	MARCKS	IPI00219301	Q05C82,P29966	MARCS_HUMAN,Q05C82_HUMAN
6146	RPL22	IPI00219153	P35268,Q8WYP0	Q8WYP0_HUMAN,RL22_HUMAN
3309	HSPA5	IPI00003362	P11021	GRP78_HUMAN
6208	RPS14	IPI00026271	P62263	RS14_HUMAN
24148	PRPF6	IPI00305068	O94906	PRP6_HUMAN
6059	ABCE1	IPI00303207	D6R9I9,P61221,D6RGF4	D6RGF4_HUMAN,D6R9I9_HUMAN,ABCE1_HUMAN
55037	PTCD3	IPI00783302	Q96EY7	PTCD3_HUMAN
1917	EEF1A2	IPI00014424	Q05639	EF1A2_HUMAN
6187	RPS2	IPI00013485	E9PMM9,Q8NI62,O60249,P15880,Q9BSW5	O60249_HUMAN,RS2_HUMAN,Q9BSW5_HUMAN,Q8NI62_HUMAN,E9PMM9_HUMAN
6223	RPS19	IPI00215780	B0ZBD0,P39019	B0ZBD0_HUMAN,RS19_HUMAN
23215	PRRC2C	IPI00083708	Q9Y520	PRC2C_HUMAN
3187	HNRNPH1	IPI00013881	P31943,E5RGH4,D6RDL0,D6RBM0,D6RFM3,D6RAM1,E7EQJ0,D6RIU0,D6RF17,E5RJ94,Q68DG4	D6RF17_HUMAN,E7EQJ0_HUMAN,E5RGH4_HUMAN,D6RBM0_HUMAN,HNRH1_HUMAN,Q68DG4_HUMAN,D6RDL0_HUMAN,E5RJ94_HUMAN,D6RIU0_HUMAN,D6RFM3_HUMAN,D6RAM1_HUMAN
3311	HSPA7	IPI00011134	P48741	HSP77_HUMAN
6224	RPS20	IPI00012493	P60866	RS20_HUMAN
60	ACTB	IPI00021439	Q9UE89,Q96DE1,B3KWQ3,Q6PJ43,Q1KLZ0,C9JTX5,A5GZ75,E7EVS6,Q562Z7,A4UCT3,P60709,F5GYT4,C9JZR7,Q96FU6,A1E282	Q1KLZ0_HUMAN,A4UCT3_HUMAN,A5GZ75_HUMAN,C9JTX5_HUMAN,Q6PJ43_HUMAN,A1E282_HUMAN,B3KWQ3_HUMAN,Q9UE89_HUMAN,F5GYT4_HUMAN,Q96FU6_HUMAN,ACTB_HUMAN,C9JZR7_HUMAN,E7EVS6_HUMAN,Q562Z7_HUMAN,Q96DE1_HUMAN
81027	TUBB1	IPI00006510	Q9H4B7	TBB1_HUMAN
23020	SNRNP200	IPI00168235	C9JAQ9	C9JAQ9_HUMAN
3320	HSP90AA1	IPI00382470,IPI00031523	Q96HX7,P07900,Q8TBA7,Q14568,Q86SX1	Q86SX1_HUMAN,Q96HX7_HUMAN,HS902_HUMAN,HS90A_HUMAN,Q8TBA7_HUMAN
492	ATP2B3	IPI00003831	Q16720,A1L3B5	A1L3B5_HUMAN,AT2B3_HUMAN
10493	VAT1	IPI00156689	B3KUF8,B0AZP7,Q99536	B3KUF8_HUMAN,B0AZP7_HUMAN,VAT1_HUMAN
3301	DNAJA1	IPI00012535	P31689,Q5T7Q0,B7Z5C0	Q5T7Q0_HUMAN,B7Z5C0_HUMAN,DNJA1_HUMAN
6230	RPS25	IPI00012750	P62851	RS25_HUMAN
55165	CEP55	IPI00101532	Q53EZ4	CEP55_HUMAN
4176	MCM7	IPI00219740,IPI00299904	P33993,F5H4S2,Q9H4N9,C9J8M6,A4D2A2	MCM7_HUMAN,A4D2A2_HUMAN,C9J8M6_HUMAN,F5H4S2_HUMAN,Q9H4N9_HUMAN
59	ACTA2	IPI00008603	F6UVQ4,D2JYH4,Q562S2,P62736,B3KPP5,Q5T9N7,B4DUI8	B3KPP5_HUMAN,Q5T9N7_HUMAN,D2JYH4_HUMAN,F6UVQ4_HUMAN,ACTA_HUMAN,B4DUI8_HUMAN,Q562S2_HUMAN
3181	HNRNPA2B1	IPI00396378	P22626	ROA2_HUMAN
10128	LRPPRC	IPI00783271	E5KNY5,P42704	LPPRC_HUMAN,E5KNY5_HUMAN
23107	MRPS27	IPI00022002	Q8N6F2,E5RJ73,B4DRT2,Q6PKB3	Q8N6F2_HUMAN,B4DRT2_HUMAN,Q6PKB3_HUMAN,E5RJ73_HUMAN
3006	HIST1H1C	IPI00217465	A8K4I2,P16403	A8K4I2_HUMAN,H12_HUMAN
1654	DDX3X	IPI00215637	O00571,Q59GX6	Q59GX6_HUMAN,DDX3X_HUMAN
26135	SERBP1	IPI00410693	D3DQ70	D3DQ70_HUMAN
7053	TGM3	IPI00300376	Q08188	TGM3_HUMAN
#MitoT-293T
10970	CKAP4	IPI00141318	Q07065	CKAP4_HUMAN
30968	STOML2	IPI00334190	Q9UJZ1	STML2_HUMAN
3312	HSPA8	IPI00003865	Q9NZ87,A8K7Q2,E9PLF4,E9PQK7,E9PN89,Q96IS6,E9PPY6,E9PK54,E9PM13,Q96BE0,E9PS65,Q96H53,E9PN25,E9PQQ4,P11142	HSP7C_HUMAN,E9PQK7_HUMAN,A8K7Q2_HUMAN,E9PK54_HUMAN,E9PLF4_HUMAN,Q9NZ87_HUMAN,E9PS65_HUMAN,E9PQQ4_HUMAN,Q96BE0_HUMAN,E9PN25_HUMAN,Q96IS6_HUMAN,E9PPY6_HUMAN,E9PN89_HUMAN,E9PM13_HUMAN,Q96H53_HUMAN
801	CALM1	IPI00075248	P62158	CALM_HUMAN
3329	HSPD1	IPI00784154	C9J0S9,Q53QD5,P10809,Q53SE2,E7EXB4,C9JCQ4,C9JL19	CH60_HUMAN,Q53SE2_HUMAN,Q53QD5_HUMAN,C9JCQ4_HUMAN,E7EXB4_HUMAN,C9J0S9_HUMAN,C9JL19_HUMAN
3313	HSPA9	IPI00007765	P38646,D6RJI2,D6RA73	GRP75_HUMAN,D6RJI2_HUMAN,D6RA73_HUMAN
5071	PARK2	IPI00005254	Q6S8G7,O60260,Q5VVX1,Q6Q2I8,Q5XNR7	Q6S8G7_HUMAN,Q5XNR7_HUMAN,PRKN2_HUMAN,Q6Q2I8_HUMAN,Q5VVX1_HUMAN
3309	HSPA5	IPI00003362	P11021	GRP78_HUMAN
28957	MRPS28	IPI00022276	Q9Y2Q9,E5RGC7	RT28_HUMAN,E5RGC7_HUMAN
3303	HSPA1A	IPI00304925	P08107	HSP71_HUMAN
5052	PRDX1	IPI00000874	Q06830	PRDX1_HUMAN
51649	MRPS23	IPI00032881	Q9Y3D9	RT23_HUMAN
3181	HNRNPA2B1	IPI00396378	P22626	ROA2_HUMAN
60	ACTB	IPI00021439	Q9UE89,Q96DE1,B3KWQ3,Q6PJ43,Q1KLZ0,C9JTX5,A5GZ75,E7EVS6,Q562Z7,A4UCT3,P60709,F5GYT4,C9JZR7,Q96FU6,A1E282	Q1KLZ0_HUMAN,A4UCT3_HUMAN,A5GZ75_HUMAN,C9JTX5_HUMAN,Q6PJ43_HUMAN,A1E282_HUMAN,B3KWQ3_HUMAN,Q9UE89_HUMAN,F5GYT4_HUMAN,Q96FU6_HUMAN,ACTB_HUMAN,C9JZR7_HUMAN,E7EVS6_HUMAN,Q562Z7_HUMAN,Q96DE1_HUMAN
345651	ACTBL2	IPI00003269	Q562R1	ACTBL_HUMAN
59	ACTA2	IPI00008603	F6UVQ4,D2JYH4,Q562S2,P62736,B3KPP5,Q5T9N7,B4DUI8	B3KPP5_HUMAN,Q5T9N7_HUMAN,D2JYH4_HUMAN,F6UVQ4_HUMAN,ACTA_HUMAN,B4DUI8_HUMAN,Q562S2_HUMAN
7284	TUFM	IPI00027107	P49411	EFTU_HUMAN
1915	EEF1A1	IPI00940393	P68104	EF1A1_HUMAN
#CytoT-293T
7431	VIM	IPI00418471	P08670	VIME_HUMAN
3312	HSPA8	IPI00003865	Q9NZ87,A8K7Q2,E9PLF4,E9PQK7,E9PN89,Q96IS6,E9PPY6,E9PK54,E9PM13,Q96BE0,E9PS65,Q96H53,E9PN25,E9PQQ4,P11142	HSP7C_HUMAN,E9PQK7_HUMAN,A8K7Q2_HUMAN,E9PK54_HUMAN,E9PLF4_HUMAN,Q9NZ87_HUMAN,E9PS65_HUMAN,E9PQQ4_HUMAN,Q96BE0_HUMAN,E9PN25_HUMAN,Q96IS6_HUMAN,E9PPY6_HUMAN,E9PN89_HUMAN,E9PM13_HUMAN,Q96H53_HUMAN
5071	PARK2	IPI00005254	Q6S8G7,O60260,Q5VVX1,Q6Q2I8,Q5XNR7	Q6S8G7_HUMAN,Q5XNR7_HUMAN,PRKN2_HUMAN,Q6Q2I8_HUMAN,Q5VVX1_HUMAN
3303	HSPA1A	IPI00304925	P08107	HSP71_HUMAN
3305	HSPA1L	IPI00643152	B4DI54	B4DI54_HUMAN
3181	HNRNPA2B1	IPI00396378	P22626	ROA2_HUMAN
213	ALB	IPI00022434	P02768	ALBU_HUMAN
3309	HSPA5	IPI00003362	P11021	GRP78_HUMAN
3313	HSPA9	IPI00007765	P38646,D6RJI2,D6RA73	GRP75_HUMAN,D6RJI2_HUMAN,D6RA73_HUMAN
3493	IGHA1	IPI00383164	Q9UP60,P01876,Q96K68,Q8NCL6,Q6MZW0	Q9UP60_HUMAN,Q96K68_HUMAN,Q6MZW0_HUMAN,Q8NCL6_HUMAN,IGHA1_HUMAN
302	ANXA2	IPI00334627	A6NMY6,P07355	AXA2L_HUMAN,ANXA2_HUMAN
59	ACTA2	IPI00008603	F6UVQ4,D2JYH4,Q562S2,P62736,B3KPP5,Q5T9N7,B4DUI8	B3KPP5_HUMAN,Q5T9N7_HUMAN,D2JYH4_HUMAN,F6UVQ4_HUMAN,ACTA_HUMAN,B4DUI8_HUMAN,Q562S2_HUMAN
801	CALM1	IPI00075248	P62158	CALM_HUMAN
60	ACTB	IPI00021439	Q9UE89,Q96DE1,B3KWQ3,Q6PJ43,Q1KLZ0,C9JTX5,A5GZ75,E7EVS6,Q562Z7,A4UCT3,P60709,F5GYT4,C9JZR7,Q96FU6,A1E282	Q1KLZ0_HUMAN,A4UCT3_HUMAN,A5GZ75_HUMAN,C9JTX5_HUMAN,Q6PJ43_HUMAN,A1E282_HUMAN,B3KWQ3_HUMAN,Q9UE89_HUMAN,F5GYT4_HUMAN,Q96FU6_HUMAN,ACTB_HUMAN,C9JZR7_HUMAN,E7EVS6_HUMAN,Q562Z7_HUMAN,Q96DE1_HUMAN
10383	TUBB2C	IPI00007752	Q96HX0,P68371	TBB2C_HUMAN,Q96HX0_HUMAN
4666	NACA	IPI00023748	B2R4P8,Q13765,Q9H009,Q9BZK3	B2R4P8_HUMAN,NACP1_HUMAN,NACA2_HUMAN,NACA_HUMAN
1994	ELAVL1	IPI00301936	B4DVB8,Q15717	B4DVB8_HUMAN,ELAV1_HUMAN
6427	SRSF2	IPI00005978	B3KUY1,Q01130,B4DN89	B3KUY1_HUMAN,B4DN89_HUMAN,SRSF2_HUMAN
2597	GAPDH	IPI00219018	E7EPW1,P04406,A4UCT1,Q0QET7,E7EUT4,Q5ZEY3	Q0QET7_HUMAN,E7EPW1_HUMAN,Q5ZEY3_HUMAN,E7EUT4_HUMAN,A4UCT1_HUMAN,G3P_HUMAN
84790	TUBA1C	IPI00166768	E9PGK3	E9PGK3_HUMAN
3311	HSPA7	IPI00011134	P48741	HSP77_HUMAN
28919	IGKV2-30	IPI00550731	P06310	KV206_HUMAN
#MitoT-SH-SY5Y
3309	HSPA5	IPI00003362	P11021	GRP78_HUMAN
213	ALB	IPI00022434,IPI00216773	P02768,Q8IUK7	ALBU_HUMAN,Q8IUK7_HUMAN
801	CALM1	IPI00075248	P62158	CALM_HUMAN
3313	HSPA9	IPI00007765	P38646,D6RJI2,D6RA73	GRP75_HUMAN,D6RJI2_HUMAN,D6RA73_HUMAN
7425	VGF	IPI00289501	O15240	VGF_HUMAN
10970	CKAP4	IPI00141318	Q07065	CKAP4_HUMAN
3329	HSPD1	IPI00784154	C9J0S9,Q53QD5,P10809,Q53SE2,E7EXB4,C9JCQ4,C9JL19	CH60_HUMAN,Q53SE2_HUMAN,Q53QD5_HUMAN,C9JCQ4_HUMAN,E7EXB4_HUMAN,C9J0S9_HUMAN,C9JL19_HUMAN
64087	MCCC2	IPI00784044	Q9HCC0	MCCB_HUMAN
813	CALU	IPI00045396,IPI00789155	D6QS48,F5H1Q9,Q6IAW5,O43852,B3KPG9	F5H1Q9_HUMAN,D6QS48_HUMAN,Q6IAW5_HUMAN,CALU_HUMAN,B3KPG9_HUMAN
5096	PCCB	IPI00007247	C9JVW9,C9JAW3,P05166,Q8WVH4	PCCB_HUMAN,Q8WVH4_HUMAN,C9JVW9_HUMAN,C9JAW3_HUMAN
7431	VIM	IPI00418471	P08670	VIME_HUMAN
10128	LRPPRC	IPI00783271	E5KNY5,P42704	LPPRC_HUMAN,E5KNY5_HUMAN
1113	CHGA	IPI00290315	P10645	CMGA_HUMAN
1114	CHGB	IPI00006601	P05060	SCG1_HUMAN
5589	PRKCSH	IPI00026154	P14314,E7EQZ9	E7EQZ9_HUMAN,GLU2B_HUMAN
30968	STOML2	IPI00334190	Q9UJZ1	STML2_HUMAN
811	CALR	IPI00020599	P27797,B4E2Y9	B4E2Y9_HUMAN,CALR_HUMAN
708	C1QBP	IPI00014230	Q07021	C1QBP_HUMAN
7284	TUFM	IPI00027107	P49411	EFTU_HUMAN
5034	P4HB	IPI00010796	P07237,B3KTQ9	PDIA1_HUMAN,B3KTQ9_HUMAN
84790	TUBA1C	IPI00166768	E9PGK3	E9PGK3_HUMAN
3312	HSPA8	IPI00003865	Q9NZ87,A8K7Q2,E9PLF4,E9PQK7,E9PN89,Q96IS6,E9PPY6,E9PK54,E9PM13,Q96BE0,E9PS65,Q96H53,E9PN25,E9PQQ4,P11142	HSP7C_HUMAN,E9PQK7_HUMAN,A8K7Q2_HUMAN,E9PK54_HUMAN,E9PLF4_HUMAN,Q9NZ87_HUMAN,E9PS65_HUMAN,E9PQQ4_HUMAN,Q96BE0_HUMAN,E9PN25_HUMAN,Q96IS6_HUMAN,E9PPY6_HUMAN,E9PN89_HUMAN,E9PM13_HUMAN,Q96H53_HUMAN
7171	TPM4	IPI00010779	P67936,B4DVY2	B4DVY2_HUMAN,TPM4_HUMAN
5071	PARK2	IPI00005254	Q6S8G7,O60260,Q5VVX1,Q6Q2I8,Q5XNR7	Q6S8G7_HUMAN,Q5XNR7_HUMAN,PRKN2_HUMAN,Q6Q2I8_HUMAN,Q5VVX1_HUMAN
6233	RPS27A	IPI00179330	B2RDW1,Q8WYN9,P62979,A8CGI2,F5GZ39	B2RDW1_HUMAN,RS27A_HUMAN,F5GZ39_HUMAN,Q8WYN9_HUMAN,A8CGI2_HUMAN
54927	CHCHD3	IPI00015833	A4D1N4,Q9NX63	CHCH3_HUMAN,A4D1N4_HUMAN
292	SLC25A5	IPI00007188	Q6NVC0,P05141	ADT2_HUMAN,Q6NVC0_HUMAN
59	ACTA2	IPI00008603	F6UVQ4,D2JYH4,Q562S2,P62736,B3KPP5,Q5T9N7,B4DUI8	B3KPP5_HUMAN,Q5T9N7_HUMAN,D2JYH4_HUMAN,F6UVQ4_HUMAN,ACTA_HUMAN,B4DUI8_HUMAN,Q562S2_HUMAN
7168	TPM1	IPI00000230	Q9Y427	Q9Y427_HUMAN
5250	SLC25A3	IPI00022202	Q6MZF9,Q00325	Q6MZF9_HUMAN,MPCP_HUMAN
5955	RCN2	IPI00029628	Q14257	RCN2_HUMAN
4724	NDUFS4	IPI00011217	O43181	NDUS4_HUMAN
60	ACTB	IPI00021439	Q9UE89,Q96DE1,B3KWQ3,Q6PJ43,Q1KLZ0,C9JTX5,A5GZ75,E7EVS6,Q562Z7,A4UCT3,P60709,F5GYT4,C9JZR7,Q96FU6,A1E282	Q1KLZ0_HUMAN,A4UCT3_HUMAN,A5GZ75_HUMAN,C9JTX5_HUMAN,Q6PJ43_HUMAN,A1E282_HUMAN,B3KWQ3_HUMAN,Q9UE89_HUMAN,F5GYT4_HUMAN,Q96FU6_HUMAN,ACTB_HUMAN,C9JZR7_HUMAN,E7EVS6_HUMAN,Q562Z7_HUMAN,Q96DE1_HUMAN
65108	MARCKSL1	IPI00641181	P49006	MRP_HUMAN
3493	IGHA1	IPI00383164	Q9UP60,P01876,Q96K68,Q8NCL6,Q6MZW0	Q9UP60_HUMAN,Q96K68_HUMAN,Q6MZW0_HUMAN,Q8NCL6_HUMAN,IGHA1_HUMAN
284110	GSDMA	IPI00166200	Q96QA5	GSDMA_HUMAN
28957	MRPS28	IPI00022276	Q9Y2Q9,E5RGC7	RT28_HUMAN,E5RGC7_HUMAN
6742	SSBP1	IPI00029744	A4D1U3,Q04837,C9K0U8,C9J8J0,E7EUY5	SSBP_HUMAN,A4D1U3_HUMAN,E7EUY5_HUMAN,C9K0U8_HUMAN,C9J8J0_HUMAN
9601	PDIA4	IPI00009904	P13667	PDIA4_HUMAN
26135	SERBP1	IPI00410693	D3DQ70	D3DQ70_HUMAN
345651	ACTBL2	IPI00003269	Q562R1	ACTBL_HUMAN
2597	GAPDH	IPI00219018	E7EPW1,P04406,A4UCT1,Q0QET7,E7EUT4,Q5ZEY3	Q0QET7_HUMAN,E7EPW1_HUMAN,Q5ZEY3_HUMAN,E7EUT4_HUMAN,A4UCT1_HUMAN,G3P_HUMAN
7170	TPM3	IPI00183968	D6RGJ6,Q5VU62	D6RGJ6_HUMAN,Q5VU62_HUMAN
7295	TXN	IPI00216298	P10599	THIO_HUMAN
6208	RPS14	IPI00026271	P62263	RS14_HUMAN
2805	GOT1	IPI00219029	P17174	AATC_HUMAN
5052	PRDX1	IPI00000874	Q06830	PRDX1_HUMAN
3181	HNRNPA2B1	IPI00396378	P22626	ROA2_HUMAN
4720	NDUFS2	IPI00025239	B7Z9L2,Q9HC11,Q9HC12,O75306	Q9HC11_HUMAN,NDUS2_HUMAN,Q9HC12_HUMAN,B7Z9L2_HUMAN
4082	MARCKS	IPI00219301	Q05C82,P29966	MARCS_HUMAN,Q05C82_HUMAN
8508	NIPSNAP1	IPI00304435	C9JDV8,Q9BPW8	C9JDV8_HUMAN,NIPS1_HUMAN
9987	HNRPDL	IPI00011274	B4DGN3,O14979	HNRDL_HUMAN,B4DGN3_HUMAN
3005	H1F0	IPI00550239	P07305	H10_HUMAN
10165	SLC25A13	IPI00007084	Q9UJS0,Q75KX8	Q75KX8_HUMAN,CMC2_HUMAN
#CytoT-SH-SY5Y
7431	VIM	IPI00418471	P08670	VIME_HUMAN
213	ALB	IPI00022434,IPI00216773	P02768,Q8IUK7	ALBU_HUMAN,Q8IUK7_HUMAN
801	CALM1	IPI00075248	P62158	CALM_HUMAN
7425	VGF	IPI00289501	O15240	VGF_HUMAN
3309	HSPA5	IPI00003362	P11021	GRP78_HUMAN
7171	TPM4	IPI00010779	P67936,B4DVY2	B4DVY2_HUMAN,TPM4_HUMAN
7277	TUBA4A	IPI00007750	C9JDS9,C9JQ00,A8MUB1,P68366,C9JEV8	C9JDS9_HUMAN,C9JQ00_HUMAN,C9JEV8_HUMAN,A8MUB1_HUMAN,TBA4A_HUMAN
3068	HDGF	IPI00020956	A8K8G0,P51858	A8K8G0_HUMAN,HDGF_HUMAN
3190	HNRNPK	IPI00216049	P61978,B3KU16	B3KU16_HUMAN,HNRPK_HUMAN
5071	PARK2	IPI00005254	Q6S8G7,O60260,Q5VVX1,Q6Q2I8,Q5XNR7	Q6S8G7_HUMAN,Q5XNR7_HUMAN,PRKN2_HUMAN,Q6Q2I8_HUMAN,Q5VVX1_HUMAN
1114	CHGB	IPI00006601	P05060	SCG1_HUMAN
1113	CHGA	IPI00290315	P10645	CMGA_HUMAN
7168	TPM1	IPI00000230	Q9Y427	Q9Y427_HUMAN
813	CALU	IPI00045396,IPI00789155	D6QS48,F5H1Q9,Q6IAW5,O43852,B3KPG9	F5H1Q9_HUMAN,D6QS48_HUMAN,Q6IAW5_HUMAN,CALU_HUMAN,B3KPG9_HUMAN
10383	TUBB2C	IPI00007752	Q96HX0,P68371	TBB2C_HUMAN,Q96HX0_HUMAN
5589	PRKCSH	IPI00026154	P14314,E7EQZ9	E7EQZ9_HUMAN,GLU2B_HUMAN
3320	HSP90AA1	IPI00382470,IPI00031523	Q96HX7,P07900,Q8TBA7,Q14568,Q86SX1	Q86SX1_HUMAN,Q96HX7_HUMAN,HS902_HUMAN,HS90A_HUMAN,Q8TBA7_HUMAN
3493	IGHA1	IPI00383164	Q9UP60,P01876,Q96K68,Q8NCL6,Q6MZW0	Q9UP60_HUMAN,Q96K68_HUMAN,Q6MZW0_HUMAN,Q8NCL6_HUMAN,IGHA1_HUMAN
7184	HSP90B1	IPI00027230	P14625,B4DHT9,Q5CAQ5	ENPL_HUMAN,Q5CAQ5_HUMAN,B4DHT9_HUMAN
9118	INA	IPI00001453	Q16352,B4DE66	AINX_HUMAN,B4DE66_HUMAN
10951	CBX1	IPI00878669	P83916	CBX1_HUMAN
84790	TUBA1C	IPI00166768	E9PGK3	E9PGK3_HUMAN
203068	TUBB	IPI01019113	P07437	TBB5_HUMAN
7170	TPM3	IPI00183968,IPI00218319	D6RGJ6,Q5VU62,Q8NI98,Q6LDX7	D6RGJ6_HUMAN,Q5VU62_HUMAN,Q8NI98_HUMAN,Q6LDX7_HUMAN
811	CALR	IPI00020599	P27797,B4E2Y9	B4E2Y9_HUMAN,CALR_HUMAN
59	ACTA2	IPI00008603	F6UVQ4,D2JYH4,Q562S2,P62736,B3KPP5,Q5T9N7,B4DUI8	B3KPP5_HUMAN,Q5T9N7_HUMAN,D2JYH4_HUMAN,F6UVQ4_HUMAN,ACTA_HUMAN,B4DUI8_HUMAN,Q562S2_HUMAN
6233	RPS27A	IPI00179330	B2RDW1,Q8WYN9,P62979,A8CGI2,F5GZ39	B2RDW1_HUMAN,RS27A_HUMAN,F5GZ39_HUMAN,Q8WYN9_HUMAN,A8CGI2_HUMAN
9601	PDIA4	IPI00009904	P13667	PDIA4_HUMAN
5034	P4HB	IPI00010796	P07237,B3KTQ9	PDIA1_HUMAN,B3KTQ9_HUMAN
708	C1QBP	IPI00014230	Q07021	C1QBP_HUMAN
10130	PDIA6	IPI00299571	Q15084	PDIA6_HUMAN
3329	HSPD1	IPI00784154	C9J0S9,Q53QD5,P10809,Q53SE2,E7EXB4,C9JCQ4,C9JL19	CH60_HUMAN,Q53SE2_HUMAN,Q53QD5_HUMAN,C9JCQ4_HUMAN,E7EXB4_HUMAN,C9J0S9_HUMAN,C9JL19_HUMAN
65108	MARCKSL1	IPI00641181	P49006	MRP_HUMAN
60	ACTB	IPI00021439	Q9UE89,Q96DE1,B3KWQ3,Q6PJ43,Q1KLZ0,C9JTX5,A5GZ75,E7EVS6,Q562Z7,A4UCT3,P60709,F5GYT4,C9JZR7,Q96FU6,A1E282	Q1KLZ0_HUMAN,A4UCT3_HUMAN,A5GZ75_HUMAN,C9JTX5_HUMAN,Q6PJ43_HUMAN,A1E282_HUMAN,B3KWQ3_HUMAN,Q9UE89_HUMAN,F5GYT4_HUMAN,Q96FU6_HUMAN,ACTB_HUMAN,C9JZR7_HUMAN,E7EVS6_HUMAN,Q562Z7_HUMAN,Q96DE1_HUMAN
81027	TUBB1	IPI00006510	Q9H4B7	TBB1_HUMAN
3312	HSPA8	IPI00003865	Q9NZ87,A8K7Q2,E9PLF4,E9PQK7,E9PN89,Q96IS6,E9PPY6,E9PK54,E9PM13,Q96BE0,E9PS65,Q96H53,E9PN25,E9PQQ4,P11142	HSP7C_HUMAN,E9PQK7_HUMAN,A8K7Q2_HUMAN,E9PK54_HUMAN,E9PLF4_HUMAN,Q9NZ87_HUMAN,E9PS65_HUMAN,E9PQQ4_HUMAN,Q96BE0_HUMAN,E9PN25_HUMAN,Q96IS6_HUMAN,E9PPY6_HUMAN,E9PN89_HUMAN,E9PM13_HUMAN,Q96H53_HUMAN
3181	HNRNPA2B1	IPI00396378	P22626	ROA2_HUMAN
3326	HSP90AB1	IPI00414676	P08238,A8K3W9	A8K3W9_HUMAN,HS90B_HUMAN
4082	MARCKS	IPI00219301	Q05C82,P29966	MARCS_HUMAN,Q05C82_HUMAN
2597	GAPDH	IPI00219018	E7EPW1,P04406,A4UCT1,Q0QET7,E7EUT4,Q5ZEY3	Q0QET7_HUMAN,E7EPW1_HUMAN,Q5ZEY3_HUMAN,E7EUT4_HUMAN,A4UCT1_HUMAN,G3P_HUMAN
1153	CIRBP	IPI00641579	Q14011	CIRBP_HUMAN
11335	CBX3	IPI00297579	A4D177,C9JMM0,Q13185	CBX3_HUMAN,A4D177_HUMAN,C9JMM0_HUMAN
6418	SET	IPI00072377	Q01105,Q5VXV3,B2REB7	SET_HUMAN,B2REB7_HUMAN,Q5VXV3_HUMAN
3184	HNRNPD	IPI00028888	Q14103,F5H6R6,D6RF44,D6RAF8	HNRPD_HUMAN,D6RF44_HUMAN,D6RAF8_HUMAN,F5H6R6_HUMAN
345651	ACTBL2	IPI00003269	Q562R1	ACTBL_HUMAN
3500	IGHG1	IPI00384938	A8K008,Q5EFE5,Q6GMX6,P01857	A8K008_HUMAN,Q5EFE5_HUMAN,Q6GMX6_HUMAN,IGHG1_HUMAN
6208	RPS14	IPI00026271	P62263	RS14_HUMAN
7531	YWHAE	IPI00000816	B7ZA86,P62258	B7ZA86_HUMAN,1433E_HUMAN
3178	HNRNPA1	IPI00215965	P09651	ROA1_HUMAN
1915	EEF1A1	IPI00940393	P68104	EF1A1_HUMAN
6421	SFPQ	IPI00010740	P23246,Q9BSV4	SFPQ_HUMAN,Q9BSV4_HUMAN
3185	HNRNPF	IPI00003881	B4DKS8,P52597,Q8NI96	Q8NI96_HUMAN,B4DKS8_HUMAN,HNRPF_HUMAN
1975	EIF4B	IPI00012079	P23588	IF4B_HUMAN
#ParkinTAP
7431	VIM	IPI00418471	P08670	VIME_HUMAN
3312	HSPA8	IPI00003865,IPI00037070	P11142,Q9NZ87,A8K7Q2,E9PLF4,E9PQK7,E9PN89,Q96IS6,E9PPY6,E9PK54,E9PM13,Q96BE0,E9PS65,Q96H53,E9PN25,E9PQQ4	HSP7C_HUMAN,E9PQK7_HUMAN,A8K7Q2_HUMAN,E9PK54_HUMAN,E9PLF4_HUMAN,Q9NZ87_HUMAN,E9PS65_HUMAN,E9PQQ4_HUMAN,Q96BE0_HUMAN,E9PN25_HUMAN,Q96IS6_HUMAN,E9PPY6_HUMAN,E9PN89_HUMAN,E9PM13_HUMAN,Q96H53_HUMAN
3303	HSPA1A	IPI00304925	P08107	HSP71_HUMAN
3181	HNRNPA2B1	IPI00396378,IPI00414696	P22626	ROA2_HUMAN
3305	HSPA1L	IPI00939442,IPI00643152	P34931,B4DI54	HS71L_HUMAN,B4DI54_HUMAN
4747	NEFL	IPI00237671	P07196	NFL_HUMAN
3313	HSPA9	IPI00007765	P38646,D6RJI2,D6RA73	GRP75_HUMAN,D6RJI2_HUMAN,D6RA73_HUMAN
5052	PRDX1	IPI00000874	Q06830	PRDX1_HUMAN
203068	TUBB	IPI01019113	Q6LC01,P07437	Q6LC01_HUMAN,TBB5_HUMAN
64087	MCCC2	IPI00784044,IPI00789428	Q9HCC0	MCCB_HUMAN
5096	PCCB	IPI00007247	P05166,C9JVW9,C9JAW3,Q8WVH4	PCCB_HUMAN,Q8WVH4_HUMAN,C9JVW9_HUMAN,C9JAW3_HUMAN
6124	RPL4	IPI00003918	P36578	RL4_HUMAN
10642	IGF2BP1	IPI00008557	Q9NZI8	IF2B1_HUMAN
3178	HNRNPA1	IPI00215965,IPI00465365,IPI00797148	P09651	ROA1_HUMAN
3183	HNRNPC	IPI00216592,IPI00477313,IPI00759596,IPI00759822	P07910	HNRPC_HUMAN
5071	PARK2	IPI00005254,IPI00332282,IPI00332283,IPI00470428,IPI00470429,IPI00984693	O60260,Q6S8G7,Q5VVX1,Q6Q2I8,Q5XNR7	PRKN2_HUMAN,Q6S8G7_HUMAN,Q5XNR7_HUMAN,Q6Q2I8_HUMAN,Q5VVX1_HUMAN
3309	HSPA5	IPI00003362	P11021	GRP78_HUMAN
113457	TUBA3D	IPI00179709,IPI00218345	Q13748	TBA3C_HUMAN
10492	SYNCRIP	IPI00018140,IPI00402182,IPI00402183,IPI00402184,IPI00402185	O60506	HNRPQ_HUMAN
343069	HNRNPCL1	IPI00027569	O60812	HNRCL_HUMAN
3187	HNRNPH1	IPI00013881	P31943,E5RGH4,D6RDL0,D6RBM0,D6RFM3,D6RAM1,E7EQJ0,D6RIU0,D6RF17,E5RJ94,Q68DG4	HNRH1_HUMAN,D6RF17_HUMAN,E7EQJ0_HUMAN,E5RGH4_HUMAN,D6RBM0_HUMAN,Q68DG4_HUMAN,D6RDL0_HUMAN,E5RJ94_HUMAN,D6RIU0_HUMAN,D6RFM3_HUMAN,D6RAM1_HUMAN
158078	EEF1A1P5	IPI00472724	Q5VTE0	EF1A3_HUMAN
3190	HNRNPK	IPI00216049,IPI00216746,IPI00807545	P61978,B3KU16	HNRPK_HUMAN,B3KU16_HUMAN
5095	PCCA	IPI00744115,IPI00895869	P05165	PCCA_HUMAN
4000	LMNA	IPI00021405,IPI00216952,IPI00216953	P02545	LMNA_HUMAN
6175	RPLP0	IPI00008530	P05388	RLA0_HUMAN
4741	NEFM	IPI00217507	P07197	NFM_HUMAN
8607	RUVBL1	IPI00021187,IPI00788942	Q9Y265	RUVB1_HUMAN
10856	RUVBL2	IPI00009104	Q9Y230	RUVB2_HUMAN
3329	HSPD1	IPI00784154	P10809,C9J0S9,Q53QD5,Q53SE2,E7EXB4,C9JCQ4,C9JL19	CH60_HUMAN,Q53SE2_HUMAN,Q53QD5_HUMAN,C9JCQ4_HUMAN,E7EXB4_HUMAN,C9J0S9_HUMAN,C9JL19_HUMAN
4001	LMNB1	IPI00217975	P20700	LMNB1_HUMAN
3306	HSPA2	IPI00007702	P54652	HSP72_HUMAN
2521	FUS	IPI00221354,IPI00260715	P35637	FUS_HUMAN
10627	MYL12A	IPI00220573	P19105	ML12A_HUMAN
801	CALM1	IPI00945782,IPI00075248	Q96HY3,P62158	Q96HY3_HUMAN,CALM_HUMAN
51121	RPL26L1	IPI00007144	Q9UNX3	RL26L_HUMAN
6147	RPL23A	IPI00021266	P62750	RL23A_HUMAN
8683	SRSF9	IPI00012340	Q13242	SRSF9_HUMAN
6129	RPL7	IPI00030179	P18124	RL7_HUMAN
23581	CASP14	IPI00013885	P31944	CASPE_HUMAN
4869	NPM1	IPI00220740,IPI00549248	P06748,E5RI98	NPM_HUMAN,E5RI98_HUMAN
302	ANXA2	IPI00418169,IPI00455315,IPI00334627	P07355,A6NMY6	ANXA2_HUMAN,AXA2L_HUMAN
3189	HNRNPH3	IPI00013877,IPI00216492,IPI00216493,IPI00216494,IPI00216495,IPI00216496	P31942	HNRH3_HUMAN
1629	DBT	IPI00003944	P11182	ODB2_HUMAN
81027	TUBB1	IPI00006510	Q9H4B7	TBB1_HUMAN
27339	PRPF19	IPI00004968	Q9UMS4	PRP19_HUMAN
6950	TCP1	IPI00290566	P17987	TCPA_HUMAN
7203	CCT3	IPI00553185	P49368	TCPG_HUMAN
2547	XRCC6	IPI00644712	P12956	XRCC6_HUMAN
1655	DDX5	IPI00017617	P17844	DDX5_HUMAN
11335	CBX3	IPI00297579	Q13185,A4D177,C9JMM0	CBX3_HUMAN,A4D177_HUMAN,C9JMM0_HUMAN
6182	MRPL12	IPI01015060	P52815	RM12_HUMAN
8363	HIST1H4J	IPI00453473	P62805	H4_HUMAN
6202	RPS8	IPI00645201	Q9BS10	Q9BS10_HUMAN
54927	CHCHD3	IPI00015833	Q9NX63,A4D1N4	CHCH3_HUMAN,A4D1N4_HUMAN
6137	RPL13	IPI00465361	P26373	RL13_HUMAN
6130	RPL7A	IPI00299573	P62424	RL7A_HUMAN
6194	RPS6	IPI00021840	P62753	RS6_HUMAN
6187	RPS2	IPI00013485	P15880,E9PMM9,Q8NI62,O60249,Q9BSW5	RS2_HUMAN,O60249_HUMAN,Q9BSW5_HUMAN,Q8NI62_HUMAN,E9PMM9_HUMAN
1994	ELAVL1	IPI00940851,IPI00301936	Q15717,B4DVB8	ELAV1_HUMAN,B4DVB8_HUMAN
6128	RPL6	IPI00790342	Q02878	RL6_HUMAN
84617	TUBB6	IPI00646779	Q9BUF5	TBB6_HUMAN
1917	EEF1A2	IPI00556204,IPI00014424	Q59GP5,Q05639	Q59GP5_HUMAN,EF1A2_HUMAN
3615	IMPDH2	IPI00291510	P12268	IMDH2_HUMAN
55854	ZC3H15	IPI00000279	Q8WU90	ZC3HF_HUMAN
10236	HNRNPR	IPI00012074,IPI00941649	O43390	HNRPR_HUMAN
9532	BAG2	IPI00000643	O95816	BAG2_HUMAN
539	ATP5O	IPI00007611	P48047	ATPO_HUMAN
6428	SRSF3	IPI00010204	P84103	SRSF3_HUMAN
6136	RPL12	IPI00024933	Q59FI9	Q59FI9_HUMAN
9939	RBM8A	IPI00001757,IPI00216659	Q9Y5S9	RBM8A_HUMAN
221613	HIST1H2AA	IPI00045109	Q96QV6	H2A1A_HUMAN
84284	NTPCR	IPI00031570	Q9BSD7	NTPCR_HUMAN
5304	PIP	IPI00022974	P12273	PIP_HUMAN
3006	HIST1H1C	IPI00217465	P16403,A8K4I2	H12_HUMAN,A8K4I2_HUMAN
292	SLC25A5	IPI00007188	P05141,Q6NVC0	ADT2_HUMAN,Q6NVC0_HUMAN
291	SLC25A4	IPI00022891	P12235	ADT1_HUMAN
6132	RPL8	IPI00012772	P62917	RL8_HUMAN
6426	SRSF1	IPI00215884,IPI00218591,IPI00218592	Q07955	SRSF1_HUMAN
22913	RALY	IPI00011268,IPI00216044	Q9UKM9	RALY_HUMAN
220988	HNRNPA3	IPI00419373,IPI00455134	P51991	ROA3_HUMAN
3184	HNRNPD	IPI00028888,IPI00220683,IPI00220684,IPI00220685	Q14103,F5H6R6,D6RF44,D6RAF8	HNRPD_HUMAN,D6RF44_HUMAN,D6RAF8_HUMAN,F5H6R6_HUMAN
2597	GAPDH	IPI00219018	P04406,E7EPW1,A4UCT1,Q0QET7,E7EUT4,Q5ZEY3	G3P_HUMAN,Q0QET7_HUMAN,E7EPW1_HUMAN,Q5ZEY3_HUMAN,E7EUT4_HUMAN,A4UCT1_HUMAN
5984	RFC4	IPI00017381	P35249	RFC4_HUMAN
56945	MRPS22	IPI00013146	P82650,E9PGX2,Q96Q16	RT22_HUMAN,Q96Q16_HUMAN,E9PGX2_HUMAN
9987	HNRPDL	IPI00011274,IPI00045498,IPI00845282	O14979,B4DGN3	HNRDL_HUMAN,B4DGN3_HUMAN
8531	CSDA	IPI00031801,IPI00219147,IPI00219148	P16989	DBPA_HUMAN
56604	TUBB7P	IPI00018511	Q99867	TBB4Q_HUMAN
84790	TUBA1C	IPI00218343,IPI00166768	Q9BQE3,E9PGK3	TBA1C_HUMAN,E9PGK3_HUMAN
10383	TUBB4B	IPI00007752	Q8IWP6,Q96HX0,P68371	Q8IWP6_HUMAN,TBB2C_HUMAN,Q96HX0_HUMAN
7284	TUFM	IPI00027107	P49411	EFTU_HUMAN
51202	DDX47	IPI00023972	Q9H0S4	DDX47_HUMAN
498	ATP5A1	IPI00440493	P25705,B4DGW3,A8K092	ATPA_HUMAN,B4DGW3_HUMAN,A8K092_HUMAN
5042	PABPC3	IPI00301154	Q9H361	PABP3_HUMAN
10521	DDX17	IPI00651653,IPI00651677,IPI00889541,IPI01022339	Q92841	DDX17_HUMAN
80336	PABPC1L	IPI00556259	Q4VXU2	PAP1L_HUMAN
4670	HNRNPM	IPI00171903,IPI00383296	P52272	HNRPM_HUMAN
10128	LRPPRC	IPI00783271	E5KNY5,P42704	LPPRC_HUMAN,E5KNY5_HUMAN
83858	ATAD3B	IPI00045921	Q5T9A4,Q9H834	ATD3B_HUMAN,Q9H834_HUMAN
30968	STOML2	IPI00334190	Q9UJZ1	STML2_HUMAN
10165	SLC25A13	IPI00007084	Q9UJS0,Q75KX8	Q75KX8_HUMAN,CMC2_HUMAN
9868	TOMM70A	IPI00015602	B3KQK0,B4DZ87,O94826,B3KQK5	B3KQK5_HUMAN,TOM70_HUMAN,B4DZ87_HUMAN,B3KQK0_HUMAN
29957	SLC25A24	IPI00337494	Q6NUK1	SCMC1_HUMAN
60	ACTB	IPI00021439	Q9UE89,Q96DE1,B3KWQ3,Q6PJ43,Q1KLZ0,C9JTX5,A5GZ75,E7EVS6,Q562Z7,A4UCT3,P60709,F5GYT4,C9JZR7,Q96FU6,A1E282	Q1KLZ0_HUMAN,A4UCT3_HUMAN,A5GZ75_HUMAN,C9JTX5_HUMAN,Q6PJ43_HUMAN,A1E282_HUMAN,B3KWQ3_HUMAN,Q9UE89_HUMAN,F5GYT4_HUMAN,Q96FU6_HUMAN,ACTB_HUMAN,C9JZR7_HUMAN,E7EVS6_HUMAN,Q562Z7_HUMAN,Q96DE1_HUMAN
55750	AGK	IPI00019353	A4D1U5,Q53H12	AGK_HUMAN,A4D1U5_HUMAN
59	ACTA2	IPI00008603	F6UVQ4,D2JYH4,Q562S2,P62736,B3KPP5,Q5T9N7,B4DUI8	B3KPP5_HUMAN,Q5T9N7_HUMAN,D2JYH4_HUMAN,F6UVQ4_HUMAN,ACTA_HUMAN,B4DUI8_HUMAN,Q562S2_HUMAN
7277	TUBA4A	IPI00007750	C9JDS9,C9JQ00,A8MUB1,P68366,C9JEV8	C9JDS9_HUMAN,C9JQ00_HUMAN,C9JEV8_HUMAN,A8MUB1_HUMAN,TBA4A_HUMAN
55037	PTCD3	IPI00783302	Q96EY7	PTCD3_HUMAN
5250	SLC25A3	IPI00022202	Q6MZF9,Q00325	Q6MZF9_HUMAN,MPCP_HUMAN
2820	GPD2	IPI00017895	F5GYK7,E7EM56,Q53RD0,P43304,Q53T76	GPDM_HUMAN,E7EM56_HUMAN,Q53T76_HUMAN,F5GYK7_HUMAN,Q53RD0_HUMAN
7818	DAP3	IPI00018120	P51398,E2JL21	RT29_HUMAN,E2JL21_HUMAN
8540	AGPS	IPI00010349	B7Z3Q4,Q53SN7,Q53SG6,Q53S12,O00116	Q53S12_HUMAN,B7Z3Q4_HUMAN,ADAS_HUMAN,Q53SG6_HUMAN,Q53SN7_HUMAN
7053	TGM3	IPI00300376	Q08188	TGM3_HUMAN
23107	MRPS27	IPI00022002	Q8N6F2,E5RJ73,B4DRT2,Q6PKB3	Q8N6F2_HUMAN,B4DRT2_HUMAN,Q6PKB3_HUMAN,E5RJ73_HUMAN
28919	IGKV2-30	IPI00550731	P06310	KV206_HUMAN
490	ATP2B1	IPI00021695	-	-
10845	CLPX	IPI00008728	O76031	CLPX_HUMAN
9551	ATP5J2	IPI00219291	C9JU26	C9JU26_HUMAN
708	C1QBP	IPI00014230	Q07021	C1QBP_HUMAN
55210	ATAD3A	IPI00295992	D2K8Q1	D2K8Q1_HUMAN
4720	NDUFS2	IPI00025239	B7Z9L2,Q9HC11,Q9HC12,O75306	Q9HC11_HUMAN,NDUS2_HUMAN,Q9HC12_HUMAN,B7Z9L2_HUMAN
345651	ACTBL2	IPI00003269	Q562R1	ACTBL_HUMAN
192111	PGAM5	IPI00063242	-	-
9131	AIFM1	IPI00000690	O95831,Q2QKE4,E9PMA0	E9PMA0_HUMAN,Q2QKE4_HUMAN,AIFM1_HUMAN
6576	SLC25A1	IPI00294159	B4DP62,P53007	B4DP62_HUMAN,TXTP_HUMAN
10240	MRPS31	IPI00294242	Q92665	RT31_HUMAN
28973	MRPS18B	IPI00022316	Q9Y676,B0S7P4	RT18B_HUMAN,B0S7P4_HUMAN
4722	NDUFS3	IPI00025796	O75489,Q9UF24	Q9UF24_HUMAN,NDUS3_HUMAN
4705	NDUFA10	IPI00029561	O95299,Q53QE8,Q53SW4	NDUAA_HUMAN,Q53SW4_HUMAN,Q53QE8_HUMAN
280	AMY2B	IPI00021447	C9JWK7,P19961,C9J2Z5	C9JWK7_HUMAN,AMY2B_HUMAN,C9J2Z5_HUMAN
3192	HNRNPU	IPI00479217	B4DLR3,Q7Z4Q5,Q9UEL2	B4DLR3_HUMAN,Q9UEL2_HUMAN,Q7Z4Q5_HUMAN
509	ATP5C1	IPI00395769	P36542,Q6I9V2,B4DFE6,Q8TAS0,B4DL14	Q6I9V2_HUMAN,B4DL14_HUMAN,ATPG_HUMAN,Q8TAS0_HUMAN,B4DFE6_HUMAN
4724	NDUFS4	IPI00011217	O43181	NDUS4_HUMAN
6208	RPS14	IPI00026271	P62263	RS14_HUMAN
84263	HSDL2	IPI00031107	B4DWC7	B4DWC7_HUMAN
51081	MRPS7	IPI00006440	Q96Q63,Q9Y2R9	RT07_HUMAN,Q96Q63_HUMAN
4976	OPA1	IPI00006721	Q6PEK6,C9JY58,O60313	Q6PEK6_HUMAN,C9JY58_HUMAN,OPA1_HUMAN
3032	HADHB	IPI00022793	P55084,C9K0M0,C9JEY0,C9JE81	C9JE81_HUMAN,C9JEY0_HUMAN,C9K0M0_HUMAN,ECHB_HUMAN
64960	MRPS15	IPI00550037	D3DPS9,P82914	D3DPS9_HUMAN,RT15_HUMAN
154796	AMOT	IPI00163085	E7ERM3,Q4VCS5	AMOT_HUMAN,E7ERM3_HUMAN
9782	MATR3	IPI00017297	D6RAY2,D6RBS2,D6RBK5,D6RAM9,D6RCM3,D6R991,B3KM87,D6RB45,Q9H4N1,D6RBI2,D6R9F3,D6R8Z5,D6REK4,D6RE02,P43243	D6RBK5_HUMAN,D6RAM9_HUMAN,D6RBS2_HUMAN,D6R991_HUMAN,D6RCM3_HUMAN,D6R8Z5_HUMAN,D6RAY2_HUMAN,MATR3_HUMAN,D6RE02_HUMAN,B3KM87_HUMAN,D6RB45_HUMAN,D6R9F3_HUMAN,D6RBI2_HUMAN,D6REK4_HUMAN,Q9H4N1_HUMAN
810	CALML3	IPI00216984	P27482	CALL3_HUMAN
1915	EEF1A1	IPI00940393	P68104	EF1A1_HUMAN
6217	RPS16	IPI00221092	P62249	RS16_HUMAN
9092	SART1	IPI00021417	O43290	SNUT1_HUMAN
4082	MARCKS	IPI00219301	Q05C82,P29966	MARCS_HUMAN,Q05C82_HUMAN
6146	RPL22	IPI00219153	P35268,Q8WYP0	Q8WYP0_HUMAN,RL22_HUMAN
24148	PRPF6	IPI00305068	O94906	PRP6_HUMAN
6059	ABCE1	IPI00303207	D6R9I9,P61221,D6RGF4	D6RGF4_HUMAN,D6R9I9_HUMAN,ABCE1_HUMAN
6223	RPS19	IPI00215780	B0ZBD0,P39019	B0ZBD0_HUMAN,RS19_HUMAN
23215	PRRC2C	IPI00083708	Q9Y520	PRC2C_HUMAN
3311	HSPA7	IPI00011134	P48741	HSP77_HUMAN
6224	RPS20	IPI00012493	P60866	RS20_HUMAN
23020	SNRNP200	IPI00168235	C9JAQ9	C9JAQ9_HUMAN
3320	HSP90AA1	IPI00382470,IPI00031523	Q96HX7,P07900,Q8TBA7,Q14568,Q86SX1	Q86SX1_HUMAN,Q96HX7_HUMAN,HS902_HUMAN,HS90A_HUMAN,Q8TBA7_HUMAN
492	ATP2B3	IPI00003831	Q16720,A1L3B5	A1L3B5_HUMAN,AT2B3_HUMAN
10493	VAT1	IPI00156689	B3KUF8,B0AZP7,Q99536	B3KUF8_HUMAN,B0AZP7_HUMAN,VAT1_HUMAN
3301	DNAJA1	IPI00012535	P31689,Q5T7Q0,B7Z5C0	Q5T7Q0_HUMAN,B7Z5C0_HUMAN,DNJA1_HUMAN
6230	RPS25	IPI00012750	P62851	RS25_HUMAN
55165	CEP55	IPI00101532	Q53EZ4	CEP55_HUMAN
4176	MCM7	IPI00219740,IPI00299904	P33993,F5H4S2,Q9H4N9,C9J8M6,A4D2A2	MCM7_HUMAN,A4D2A2_HUMAN,C9J8M6_HUMAN,F5H4S2_HUMAN,Q9H4N9_HUMAN
1654	DDX3X	IPI00215637	O00571,Q59GX6	Q59GX6_HUMAN,DDX3X_HUMAN
26135	SERBP1	IPI00410693	D3DQ70	D3DQ70_HUMAN
10970	CKAP4	IPI00141318	Q07065	CKAP4_HUMAN
28957	MRPS28	IPI00022276	Q9Y2Q9,E5RGC7	RT28_HUMAN,E5RGC7_HUMAN
51649	MRPS23	IPI00032881	Q9Y3D9	RT23_HUMAN
213	ALB	IPI00022434,IPI00216773	P02768,Q8IUK7	ALBU_HUMAN,Q8IUK7_HUMAN
3493	IGHA1	IPI00383164	Q9UP60,P01876,Q96K68,Q8NCL6,Q6MZW0	Q9UP60_HUMAN,Q96K68_HUMAN,Q6MZW0_HUMAN,Q8NCL6_HUMAN,IGHA1_HUMAN
4666	NACA	IPI00023748	B2R4P8,Q13765,Q9H009,Q9BZK3	B2R4P8_HUMAN,NACP1_HUMAN,NACA2_HUMAN,NACA_HUMAN
6427	SRSF2	IPI00005978	B3KUY1,Q01130,B4DN89	B3KUY1_HUMAN,B4DN89_HUMAN,SRSF2_HUMAN
7425	VGF	IPI00289501	O15240	VGF_HUMAN
813	CALU	IPI00045396,IPI00789155	D6QS48,F5H1Q9,Q6IAW5,O43852,B3KPG9	F5H1Q9_HUMAN,D6QS48_HUMAN,Q6IAW5_HUMAN,CALU_HUMAN,B3KPG9_HUMAN
1113	CHGA	IPI00290315	P10645	CMGA_HUMAN
1114	CHGB	IPI00006601	P05060	SCG1_HUMAN
5589	PRKCSH	IPI00026154	P14314,E7EQZ9	E7EQZ9_HUMAN,GLU2B_HUMAN
811	CALR	IPI00020599	P27797,B4E2Y9	B4E2Y9_HUMAN,CALR_HUMAN
5034	P4HB	IPI00010796	P07237,B3KTQ9	PDIA1_HUMAN,B3KTQ9_HUMAN
7171	TPM4	IPI00010779	P67936,B4DVY2	B4DVY2_HUMAN,TPM4_HUMAN
6233	RPS27A	IPI00179330	B2RDW1,Q8WYN9,P62979,A8CGI2,F5GZ39	B2RDW1_HUMAN,RS27A_HUMAN,F5GZ39_HUMAN,Q8WYN9_HUMAN,A8CGI2_HUMAN
7168	TPM1	IPI00000230	Q9Y427	Q9Y427_HUMAN
5955	RCN2	IPI00029628	Q14257	RCN2_HUMAN
65108	MARCKSL1	IPI00641181	P49006	MRP_HUMAN
284110	GSDMA	IPI00166200	Q96QA5	GSDMA_HUMAN
6742	SSBP1	IPI00029744	A4D1U3,Q04837,C9K0U8,C9J8J0,E7EUY5	SSBP_HUMAN,A4D1U3_HUMAN,E7EUY5_HUMAN,C9K0U8_HUMAN,C9J8J0_HUMAN
9601	PDIA4	IPI00009904	P13667	PDIA4_HUMAN
7170	TPM3	IPI00183968,IPI00218319	D6RGJ6,Q5VU62,Q8NI98,Q6LDX7	D6RGJ6_HUMAN,Q5VU62_HUMAN,Q8NI98_HUMAN,Q6LDX7_HUMAN
7295	TXN	IPI00216298	P10599	THIO_HUMAN
2805	GOT1	IPI00219029	P17174	AATC_HUMAN
8508	NIPSNAP1	IPI00304435	C9JDV8,Q9BPW8	C9JDV8_HUMAN,NIPS1_HUMAN
3005	H1F0	IPI00550239	P07305	H10_HUMAN
3068	HDGF	IPI00020956	A8K8G0,P51858	A8K8G0_HUMAN,HDGF_HUMAN
7184	HSP90B1	IPI00027230	P14625,B4DHT9,Q5CAQ5	ENPL_HUMAN,Q5CAQ5_HUMAN,B4DHT9_HUMAN
9118	INA	IPI00001453	Q16352,B4DE66	AINX_HUMAN,B4DE66_HUMAN
10951	CBX1	IPI00878669	P83916	CBX1_HUMAN
10130	PDIA6	IPI00299571	Q15084	PDIA6_HUMAN
3326	HSP90AB1	IPI00414676	P08238,A8K3W9	A8K3W9_HUMAN,HS90B_HUMAN
1153	CIRBP	IPI00641579	Q14011	CIRBP_HUMAN
6418	SET	IPI00072377	Q01105,Q5VXV3,B2REB7	SET_HUMAN,B2REB7_HUMAN,Q5VXV3_HUMAN
3500	IGHG1	IPI00384938	A8K008,Q5EFE5,Q6GMX6,P01857	A8K008_HUMAN,Q5EFE5_HUMAN,Q6GMX6_HUMAN,IGHG1_HUMAN
7531	YWHAE	IPI00000816	B7ZA86,P62258	B7ZA86_HUMAN,1433E_HUMAN
6421	SFPQ	IPI00010740	P23246,Q9BSV4	SFPQ_HUMAN,Q9BSV4_HUMAN
3185	HNRNPF	IPI00003881	B4DKS8,P52597,Q8NI96	Q8NI96_HUMAN,B4DKS8_HUMAN,HNRPF_HUMAN
1975	EIF4B	IPI00012079	P23588	IF4B_HUMAN
#Mito
801	CALM1	IPI00075248	P62158	CALM_HUMAN
10128	LRPPRC	IPI00783271	E5KNY5,P42704	LPPRC_HUMAN,E5KNY5_HUMAN
3313	HSPA9	IPI00007765	P38646,D6RJI2,D6RA73	GRP75_HUMAN,D6RJI2_HUMAN,D6RA73_HUMAN
83858	ATAD3B	IPI00045921	Q5T9A4,Q9H834	ATD3B_HUMAN,Q9H834_HUMAN
10383	TUBB2C	IPI00007752	Q96HX0,P68371	TBB2C_HUMAN,Q96HX0_HUMAN
3329	HSPD1	IPI00784154	C9J0S9,Q53QD5,P10809,Q53SE2,E7EXB4,C9JCQ4,C9JL19	CH60_HUMAN,Q53SE2_HUMAN,Q53QD5_HUMAN,C9JCQ4_HUMAN,E7EXB4_HUMAN,C9J0S9_HUMAN,C9JL19_HUMAN
3312	HSPA8	IPI00003865	Q9NZ87,A8K7Q2,E9PLF4,E9PQK7,E9PN89,Q96IS6,E9PPY6,E9PK54,E9PM13,Q96BE0,E9PS65,Q96H53,E9PN25,E9PQQ4,P11142	HSP7C_HUMAN,E9PQK7_HUMAN,A8K7Q2_HUMAN,E9PK54_HUMAN,E9PLF4_HUMAN,Q9NZ87_HUMAN,E9PS65_HUMAN,E9PQQ4_HUMAN,Q96BE0_HUMAN,E9PN25_HUMAN,Q96IS6_HUMAN,E9PPY6_HUMAN,E9PN89_HUMAN,E9PM13_HUMAN,Q96H53_HUMAN
292	SLC25A5	IPI00007188	Q6NVC0,P05141	ADT2_HUMAN,Q6NVC0_HUMAN
7284	TUFM	IPI00027107	P49411	EFTU_HUMAN
30968	STOML2	IPI00334190	Q9UJZ1	STML2_HUMAN
5071	PARK2	IPI00005254	Q6S8G7,O60260,Q5VVX1,Q6Q2I8,Q5XNR7	Q6S8G7_HUMAN,Q5XNR7_HUMAN,PRKN2_HUMAN,Q6Q2I8_HUMAN,Q5VVX1_HUMAN
3303	HSPA1A	IPI00304925	P08107	HSP71_HUMAN
498	ATP5A1	IPI00440493	B4DGW3,P25705,A8K092	B4DGW3_HUMAN,A8K092_HUMAN,ATPA_HUMAN
10165	SLC25A13	IPI00007084	Q9UJS0,Q75KX8	Q75KX8_HUMAN,CMC2_HUMAN
7431	VIM	IPI00418471	P08670	VIME_HUMAN
9868	TOMM70A	IPI00015602	B3KQK0,B4DZ87,O94826,B3KQK5	B3KQK5_HUMAN,TOM70_HUMAN,B4DZ87_HUMAN,B3KQK0_HUMAN
29957	SLC25A24	IPI00337494	Q6NUK1	SCMC1_HUMAN
60	ACTB	IPI00021439	Q9UE89,Q96DE1,B3KWQ3,Q6PJ43,Q1KLZ0,C9JTX5,A5GZ75,E7EVS6,Q562Z7,A4UCT3,P60709,F5GYT4,C9JZR7,Q96FU6,A1E282	Q1KLZ0_HUMAN,A4UCT3_HUMAN,A5GZ75_HUMAN,C9JTX5_HUMAN,Q6PJ43_HUMAN,A1E282_HUMAN,B3KWQ3_HUMAN,Q9UE89_HUMAN,F5GYT4_HUMAN,Q96FU6_HUMAN,ACTB_HUMAN,C9JZR7_HUMAN,E7EVS6_HUMAN,Q562Z7_HUMAN,Q96DE1_HUMAN
55750	AGK	IPI00019353	A4D1U5,Q53H12	AGK_HUMAN,A4D1U5_HUMAN
59	ACTA2	IPI00008603	F6UVQ4,D2JYH4,Q562S2,P62736,B3KPP5,Q5T9N7,B4DUI8	B3KPP5_HUMAN,Q5T9N7_HUMAN,D2JYH4_HUMAN,F6UVQ4_HUMAN,ACTA_HUMAN,B4DUI8_HUMAN,Q562S2_HUMAN
7277	TUBA4A	IPI00007750	C9JDS9,C9JQ00,A8MUB1,P68366,C9JEV8	C9JDS9_HUMAN,C9JQ00_HUMAN,C9JEV8_HUMAN,A8MUB1_HUMAN,TBA4A_HUMAN
55037	PTCD3	IPI00783302	Q96EY7	PTCD3_HUMAN
5250	SLC25A3	IPI00022202	Q6MZF9,Q00325	Q6MZF9_HUMAN,MPCP_HUMAN
56945	MRPS22	IPI00013146	P82650,E9PGX2,Q96Q16	Q96Q16_HUMAN,E9PGX2_HUMAN,RT22_HUMAN
2820	GPD2	IPI00017895	F5GYK7,E7EM56,Q53RD0,P43304,Q53T76	GPDM_HUMAN,E7EM56_HUMAN,Q53T76_HUMAN,F5GYK7_HUMAN,Q53RD0_HUMAN
84790	TUBA1C	IPI00166768	E9PGK3	E9PGK3_HUMAN
3309	HSPA5	IPI00003362	P11021	GRP78_HUMAN
7818	DAP3	IPI00018120	P51398,E2JL21	RT29_HUMAN,E2JL21_HUMAN
203068	TUBB	IPI01019113	P07437	TBB5_HUMAN
3305	HSPA1L	IPI00643152	B4DI54	B4DI54_HUMAN
8540	AGPS	IPI00010349	B7Z3Q4,Q53SN7,Q53SG6,Q53S12,O00116	Q53S12_HUMAN,B7Z3Q4_HUMAN,ADAS_HUMAN,Q53SG6_HUMAN,Q53SN7_HUMAN
7053	TGM3	IPI00300376	Q08188	TGM3_HUMAN
23107	MRPS27	IPI00022002	Q8N6F2,E5RJ73,B4DRT2,Q6PKB3	Q8N6F2_HUMAN,B4DRT2_HUMAN,Q6PKB3_HUMAN,E5RJ73_HUMAN
28919	IGKV2-30	IPI00550731	P06310	KV206_HUMAN
490	ATP2B1	IPI00021695	-	-
10845	CLPX	IPI00008728	O76031	CLPX_HUMAN
9551	ATP5J2	IPI00219291	C9JU26	C9JU26_HUMAN
708	C1QBP	IPI00014230	Q07021	C1QBP_HUMAN
55210	ATAD3A	IPI00295992	D2K8Q1	D2K8Q1_HUMAN
4720	NDUFS2	IPI00025239	B7Z9L2,Q9HC11,Q9HC12,O75306	Q9HC11_HUMAN,NDUS2_HUMAN,Q9HC12_HUMAN,B7Z9L2_HUMAN
345651	ACTBL2	IPI00003269	Q562R1	ACTBL_HUMAN
192111	PGAM5	IPI00063242	-	-
9131	AIFM1	IPI00000690	O95831,Q2QKE4,E9PMA0	E9PMA0_HUMAN,Q2QKE4_HUMAN,AIFM1_HUMAN
3006	HIST1H1C	IPI00217465	A8K4I2,P16403	A8K4I2_HUMAN,H12_HUMAN
6576	SLC25A1	IPI00294159	B4DP62,P53007	B4DP62_HUMAN,TXTP_HUMAN
10240	MRPS31	IPI00294242	Q92665	RT31_HUMAN
28973	MRPS18B	IPI00022316	Q9Y676,B0S7P4	RT18B_HUMAN,B0S7P4_HUMAN
4722	NDUFS3	IPI00025796	O75489,Q9UF24	Q9UF24_HUMAN,NDUS3_HUMAN
4705	NDUFA10	IPI00029561	O95299,Q53QE8,Q53SW4	NDUAA_HUMAN,Q53SW4_HUMAN,Q53QE8_HUMAN
81027	TUBB1	IPI00006510	Q9H4B7	TBB1_HUMAN
280	AMY2B	IPI00021447	C9JWK7,P19961,C9J2Z5	C9JWK7_HUMAN,AMY2B_HUMAN,C9J2Z5_HUMAN
3192	HNRNPU	IPI00479217	B4DLR3,Q7Z4Q5,Q9UEL2	B4DLR3_HUMAN,Q9UEL2_HUMAN,Q7Z4Q5_HUMAN
8363	HIST1H4J	IPI00453473	P62805	H4_HUMAN
509	ATP5C1	IPI00395769	P36542,Q6I9V2,B4DFE6,Q8TAS0,B4DL14	Q6I9V2_HUMAN,B4DL14_HUMAN,ATPG_HUMAN,Q8TAS0_HUMAN,B4DFE6_HUMAN
2597	GAPDH	IPI00219018	E7EPW1,P04406,A4UCT1,Q0QET7,E7EUT4,Q5ZEY3	Q0QET7_HUMAN,E7EPW1_HUMAN,Q5ZEY3_HUMAN,E7EUT4_HUMAN,A4UCT1_HUMAN,G3P_HUMAN
4724	NDUFS4	IPI00011217	O43181	NDUS4_HUMAN
6187	RPS2	IPI00013485	E9PMM9,Q8NI62,O60249,P15880,Q9BSW5	O60249_HUMAN,RS2_HUMAN,Q9BSW5_HUMAN,Q8NI62_HUMAN,E9PMM9_HUMAN
302	ANXA2	IPI00334627	A6NMY6,P07355	AXA2L_HUMAN,ANXA2_HUMAN
6208	RPS14	IPI00026271	P62263	RS14_HUMAN
84263	HSDL2	IPI00031107	B4DWC7	B4DWC7_HUMAN
51081	MRPS7	IPI00006440	Q96Q63,Q9Y2R9	RT07_HUMAN,Q96Q63_HUMAN
4976	OPA1	IPI00006721	Q6PEK6,C9JY58,O60313	Q6PEK6_HUMAN,C9JY58_HUMAN,OPA1_HUMAN
3032	HADHB	IPI00022793	P55084,C9K0M0,C9JEY0,C9JE81	C9JE81_HUMAN,C9JEY0_HUMAN,C9K0M0_HUMAN,ECHB_HUMAN
539	ATP5O	IPI00007611	P48047	ATPO_HUMAN
64960	MRPS15	IPI00550037	D3DPS9,P82914	D3DPS9_HUMAN,RT15_HUMAN
10970	CKAP4	IPI00141318	Q07065	CKAP4_HUMAN
28957	MRPS28	IPI00022276	Q9Y2Q9,E5RGC7	RT28_HUMAN,E5RGC7_HUMAN
5052	PRDX1	IPI00000874	Q06830	PRDX1_HUMAN
51649	MRPS23	IPI00032881	Q9Y3D9	RT23_HUMAN
3181	HNRNPA2B1	IPI00396378	P22626	ROA2_HUMAN
1915	EEF1A1	IPI00940393	P68104	EF1A1_HUMAN
213	ALB	IPI00022434,IPI00216773	P02768,Q8IUK7	ALBU_HUMAN,Q8IUK7_HUMAN
7425	VGF	IPI00289501	O15240	VGF_HUMAN
64087	MCCC2	IPI00784044	Q9HCC0	MCCB_HUMAN
813	CALU	IPI00045396,IPI00789155	D6QS48,F5H1Q9,Q6IAW5,O43852,B3KPG9	F5H1Q9_HUMAN,D6QS48_HUMAN,Q6IAW5_HUMAN,CALU_HUMAN,B3KPG9_HUMAN
5096	PCCB	IPI00007247	C9JVW9,C9JAW3,P05166,Q8WVH4	PCCB_HUMAN,Q8WVH4_HUMAN,C9JVW9_HUMAN,C9JAW3_HUMAN
1113	CHGA	IPI00290315	P10645	CMGA_HUMAN
1114	CHGB	IPI00006601	P05060	SCG1_HUMAN
5589	PRKCSH	IPI00026154	P14314,E7EQZ9	E7EQZ9_HUMAN,GLU2B_HUMAN
811	CALR	IPI00020599	P27797,B4E2Y9	B4E2Y9_HUMAN,CALR_HUMAN
5034	P4HB	IPI00010796	P07237,B3KTQ9	PDIA1_HUMAN,B3KTQ9_HUMAN
7171	TPM4	IPI00010779	P67936,B4DVY2	B4DVY2_HUMAN,TPM4_HUMAN
6233	RPS27A	IPI00179330	B2RDW1,Q8WYN9,P62979,A8CGI2,F5GZ39	B2RDW1_HUMAN,RS27A_HUMAN,F5GZ39_HUMAN,Q8WYN9_HUMAN,A8CGI2_HUMAN
54927	CHCHD3	IPI00015833	A4D1N4,Q9NX63	CHCH3_HUMAN,A4D1N4_HUMAN
7168	TPM1	IPI00000230	Q9Y427	Q9Y427_HUMAN
5955	RCN2	IPI00029628	Q14257	RCN2_HUMAN
65108	MARCKSL1	IPI00641181	P49006	MRP_HUMAN
3493	IGHA1	IPI00383164	Q9UP60,P01876,Q96K68,Q8NCL6,Q6MZW0	Q9UP60_HUMAN,Q96K68_HUMAN,Q6MZW0_HUMAN,Q8NCL6_HUMAN,IGHA1_HUMAN
284110	GSDMA	IPI00166200	Q96QA5	GSDMA_HUMAN
6742	SSBP1	IPI00029744	A4D1U3,Q04837,C9K0U8,C9J8J0,E7EUY5	SSBP_HUMAN,A4D1U3_HUMAN,E7EUY5_HUMAN,C9K0U8_HUMAN,C9J8J0_HUMAN
9601	PDIA4	IPI00009904	P13667	PDIA4_HUMAN
26135	SERBP1	IPI00410693	D3DQ70	D3DQ70_HUMAN
7170	TPM3	IPI00183968	D6RGJ6,Q5VU62	D6RGJ6_HUMAN,Q5VU62_HUMAN
7295	TXN	IPI00216298	P10599	THIO_HUMAN
2805	GOT1	IPI00219029	P17174	AATC_HUMAN
4082	MARCKS	IPI00219301	Q05C82,P29966	MARCS_HUMAN,Q05C82_HUMAN
8508	NIPSNAP1	IPI00304435	C9JDV8,Q9BPW8	C9JDV8_HUMAN,NIPS1_HUMAN
9987	HNRPDL	IPI00011274	B4DGN3,O14979	HNRDL_HUMAN,B4DGN3_HUMAN
3005	H1F0	IPI00550239	P07305	H10_HUMAN
#Cyto
801	CALM1	IPI00075248	P62158	CALM_HUMAN
7431	VIM	IPI00418471	P08670	VIME_HUMAN
10383	TUBB2C	IPI00007752	Q96HX0,P68371	TBB2C_HUMAN,Q96HX0_HUMAN
3312	HSPA8	IPI00003865	Q9NZ87,A8K7Q2,E9PLF4,E9PQK7,E9PN89,Q96IS6,E9PPY6,E9PK54,E9PM13,Q96BE0,E9PS65,Q96H53,E9PN25,E9PQQ4,P11142	HSP7C_HUMAN,E9PQK7_HUMAN,A8K7Q2_HUMAN,E9PK54_HUMAN,E9PLF4_HUMAN,Q9NZ87_HUMAN,E9PS65_HUMAN,E9PQQ4_HUMAN,Q96BE0_HUMAN,E9PN25_HUMAN,Q96IS6_HUMAN,E9PPY6_HUMAN,E9PN89_HUMAN,E9PM13_HUMAN,Q96H53_HUMAN
3303	HSPA1A	IPI00304925	P08107	HSP71_HUMAN
5071	PARK2	IPI00005254	Q6S8G7,O60260,Q5VVX1,Q6Q2I8,Q5XNR7	Q6S8G7_HUMAN,Q5XNR7_HUMAN,PRKN2_HUMAN,Q6Q2I8_HUMAN,Q5VVX1_HUMAN
7277	TUBA4A	IPI00007750	C9JDS9,C9JQ00,A8MUB1,P68366,C9JEV8	C9JDS9_HUMAN,C9JQ00_HUMAN,C9JEV8_HUMAN,A8MUB1_HUMAN,TBA4A_HUMAN
3192	HNRNPU	IPI00479217	B4DLR3,Q7Z4Q5,Q9UEL2	B4DLR3_HUMAN,Q9UEL2_HUMAN,Q7Z4Q5_HUMAN
154796	AMOT	IPI00163085	E7ERM3,Q4VCS5	AMOT_HUMAN,E7ERM3_HUMAN
4869	NPM1	IPI00220740	E5RI98	E5RI98_HUMAN
203068	TUBB	IPI01019113	P07437	TBB5_HUMAN
3305	HSPA1L	IPI00643152	B4DI54	B4DI54_HUMAN
1655	DDX5	IPI00017617	P17844	DDX5_HUMAN
9782	MATR3	IPI00017297	D6RAY2,D6RBS2,D6RBK5,D6RAM9,D6RCM3,D6R991,B3KM87,D6RB45,Q9H4N1,D6RBI2,D6R9F3,D6R8Z5,D6REK4,D6RE02,P43243	D6RBK5_HUMAN,D6RAM9_HUMAN,D6RBS2_HUMAN,D6R991_HUMAN,D6RCM3_HUMAN,D6R8Z5_HUMAN,D6RAY2_HUMAN,MATR3_HUMAN,D6RE02_HUMAN,B3KM87_HUMAN,D6RB45_HUMAN,D6R9F3_HUMAN,D6RBI2_HUMAN,D6REK4_HUMAN,Q9H4N1_HUMAN
810	CALML3	IPI00216984	P27482	CALL3_HUMAN
84790	TUBA1C	IPI00166768	E9PGK3	E9PGK3_HUMAN
3329	HSPD1	IPI00784154	C9J0S9,Q53QD5,P10809,Q53SE2,E7EXB4,C9JCQ4,C9JL19	CH60_HUMAN,Q53SE2_HUMAN,Q53QD5_HUMAN,C9JCQ4_HUMAN,E7EXB4_HUMAN,C9J0S9_HUMAN,C9JL19_HUMAN
1915	EEF1A1	IPI00940393	P68104	EF1A1_HUMAN
6217	RPS16	IPI00221092	P62249	RS16_HUMAN
302	ANXA2	IPI00334627	A6NMY6,P07355	AXA2L_HUMAN,ANXA2_HUMAN
9092	SART1	IPI00021417	O43290	SNUT1_HUMAN
292	SLC25A5	IPI00007188	Q6NVC0,P05141	ADT2_HUMAN,Q6NVC0_HUMAN
3313	HSPA9	IPI00007765	P38646,D6RJI2,D6RA73	GRP75_HUMAN,D6RJI2_HUMAN,D6RA73_HUMAN
4082	MARCKS	IPI00219301	Q05C82,P29966	MARCS_HUMAN,Q05C82_HUMAN
6146	RPL22	IPI00219153	P35268,Q8WYP0	Q8WYP0_HUMAN,RL22_HUMAN
3309	HSPA5	IPI00003362	P11021	GRP78_HUMAN
6208	RPS14	IPI00026271	P62263	RS14_HUMAN
24148	PRPF6	IPI00305068	O94906	PRP6_HUMAN
6059	ABCE1	IPI00303207	D6R9I9,P61221,D6RGF4	D6RGF4_HUMAN,D6R9I9_HUMAN,ABCE1_HUMAN
55037	PTCD3	IPI00783302	Q96EY7	PTCD3_HUMAN
1917	EEF1A2	IPI00014424	Q05639	EF1A2_HUMAN
6187	RPS2	IPI00013485	E9PMM9,Q8NI62,O60249,P15880,Q9BSW5	O60249_HUMAN,RS2_HUMAN,Q9BSW5_HUMAN,Q8NI62_HUMAN,E9PMM9_HUMAN
6223	RPS19	IPI00215780	B0ZBD0,P39019	B0ZBD0_HUMAN,RS19_HUMAN
23215	PRRC2C	IPI00083708	Q9Y520	PRC2C_HUMAN
3187	HNRNPH1	IPI00013881	P31943,E5RGH4,D6RDL0,D6RBM0,D6RFM3,D6RAM1,E7EQJ0,D6RIU0,D6RF17,E5RJ94,Q68DG4	D6RF17_HUMAN,E7EQJ0_HUMAN,E5RGH4_HUMAN,D6RBM0_HUMAN,HNRH1_HUMAN,Q68DG4_HUMAN,D6RDL0_HUMAN,E5RJ94_HUMAN,D6RIU0_HUMAN,D6RFM3_HUMAN,D6RAM1_HUMAN
3311	HSPA7	IPI00011134	P48741	HSP77_HUMAN
6224	RPS20	IPI00012493	P60866	RS20_HUMAN
60	ACTB	IPI00021439	Q9UE89,Q96DE1,B3KWQ3,Q6PJ43,Q1KLZ0,C9JTX5,A5GZ75,E7EVS6,Q562Z7,A4UCT3,P60709,F5GYT4,C9JZR7,Q96FU6,A1E282	Q1KLZ0_HUMAN,A4UCT3_HUMAN,A5GZ75_HUMAN,C9JTX5_HUMAN,Q6PJ43_HUMAN,A1E282_HUMAN,B3KWQ3_HUMAN,Q9UE89_HUMAN,F5GYT4_HUMAN,Q96FU6_HUMAN,ACTB_HUMAN,C9JZR7_HUMAN,E7EVS6_HUMAN,Q562Z7_HUMAN,Q96DE1_HUMAN
81027	TUBB1	IPI00006510	Q9H4B7	TBB1_HUMAN
23020	SNRNP200	IPI00168235	C9JAQ9	C9JAQ9_HUMAN
3320	HSP90AA1	IPI00382470,IPI00031523	Q96HX7,P07900,Q8TBA7,Q14568,Q86SX1	Q86SX1_HUMAN,Q96HX7_HUMAN,HS902_HUMAN,HS90A_HUMAN,Q8TBA7_HUMAN
492	ATP2B3	IPI00003831	Q16720,A1L3B5	A1L3B5_HUMAN,AT2B3_HUMAN
10493	VAT1	IPI00156689	B3KUF8,B0AZP7,Q99536	B3KUF8_HUMAN,B0AZP7_HUMAN,VAT1_HUMAN
3301	DNAJA1	IPI00012535	P31689,Q5T7Q0,B7Z5C0	Q5T7Q0_HUMAN,B7Z5C0_HUMAN,DNJA1_HUMAN
6230	RPS25	IPI00012750	P62851	RS25_HUMAN
55165	CEP55	IPI00101532	Q53EZ4	CEP55_HUMAN
4176	MCM7	IPI00219740,IPI00299904	P33993,F5H4S2,Q9H4N9,C9J8M6,A4D2A2	MCM7_HUMAN,A4D2A2_HUMAN,C9J8M6_HUMAN,F5H4S2_HUMAN,Q9H4N9_HUMAN
59	ACTA2	IPI00008603	F6UVQ4,D2JYH4,Q562S2,P62736,B3KPP5,Q5T9N7,B4DUI8	B3KPP5_HUMAN,Q5T9N7_HUMAN,D2JYH4_HUMAN,F6UVQ4_HUMAN,ACTA_HUMAN,B4DUI8_HUMAN,Q562S2_HUMAN
3181	HNRNPA2B1	IPI00396378	P22626	ROA2_HUMAN
10128	LRPPRC	IPI00783271	E5KNY5,P42704	LPPRC_HUMAN,E5KNY5_HUMAN
23107	MRPS27	IPI00022002	Q8N6F2,E5RJ73,B4DRT2,Q6PKB3	Q8N6F2_HUMAN,B4DRT2_HUMAN,Q6PKB3_HUMAN,E5RJ73_HUMAN
3006	HIST1H1C	IPI00217465	A8K4I2,P16403	A8K4I2_HUMAN,H12_HUMAN
1654	DDX3X	IPI00215637	O00571,Q59GX6	Q59GX6_HUMAN,DDX3X_HUMAN
26135	SERBP1	IPI00410693	D3DQ70	D3DQ70_HUMAN
7053	TGM3	IPI00300376	Q08188	TGM3_HUMAN
213	ALB	IPI00022434,IPI00216773	P02768,Q8IUK7	ALBU_HUMAN,Q8IUK7_HUMAN
3493	IGHA1	IPI00383164	Q9UP60,P01876,Q96K68,Q8NCL6,Q6MZW0	Q9UP60_HUMAN,Q96K68_HUMAN,Q6MZW0_HUMAN,Q8NCL6_HUMAN,IGHA1_HUMAN
4666	NACA	IPI00023748	B2R4P8,Q13765,Q9H009,Q9BZK3	B2R4P8_HUMAN,NACP1_HUMAN,NACA2_HUMAN,NACA_HUMAN
1994	ELAVL1	IPI00301936	B4DVB8,Q15717	B4DVB8_HUMAN,ELAV1_HUMAN
6427	SRSF2	IPI00005978	B3KUY1,Q01130,B4DN89	B3KUY1_HUMAN,B4DN89_HUMAN,SRSF2_HUMAN
2597	GAPDH	IPI00219018	E7EPW1,P04406,A4UCT1,Q0QET7,E7EUT4,Q5ZEY3	Q0QET7_HUMAN,E7EPW1_HUMAN,Q5ZEY3_HUMAN,E7EUT4_HUMAN,A4UCT1_HUMAN,G3P_HUMAN
28919	IGKV2-30	IPI00550731	P06310	KV206_HUMAN
7425	VGF	IPI00289501	O15240	VGF_HUMAN
7171	TPM4	IPI00010779	P67936,B4DVY2	B4DVY2_HUMAN,TPM4_HUMAN
3068	HDGF	IPI00020956	A8K8G0,P51858	A8K8G0_HUMAN,HDGF_HUMAN
3190	HNRNPK	IPI00216049	P61978,B3KU16	B3KU16_HUMAN,HNRPK_HUMAN
1114	CHGB	IPI00006601	P05060	SCG1_HUMAN
1113	CHGA	IPI00290315	P10645	CMGA_HUMAN
7168	TPM1	IPI00000230	Q9Y427	Q9Y427_HUMAN
813	CALU	IPI00045396,IPI00789155	D6QS48,F5H1Q9,Q6IAW5,O43852,B3KPG9	F5H1Q9_HUMAN,D6QS48_HUMAN,Q6IAW5_HUMAN,CALU_HUMAN,B3KPG9_HUMAN
5589	PRKCSH	IPI00026154	P14314,E7EQZ9	E7EQZ9_HUMAN,GLU2B_HUMAN
7184	HSP90B1	IPI00027230	P14625,B4DHT9,Q5CAQ5	ENPL_HUMAN,Q5CAQ5_HUMAN,B4DHT9_HUMAN
9118	INA	IPI00001453	Q16352,B4DE66	AINX_HUMAN,B4DE66_HUMAN
10951	CBX1	IPI00878669	P83916	CBX1_HUMAN
7170	TPM3	IPI00183968,IPI00218319	D6RGJ6,Q5VU62,Q8NI98,Q6LDX7	D6RGJ6_HUMAN,Q5VU62_HUMAN,Q8NI98_HUMAN,Q6LDX7_HUMAN
811	CALR	IPI00020599	P27797,B4E2Y9	B4E2Y9_HUMAN,CALR_HUMAN
6233	RPS27A	IPI00179330	B2RDW1,Q8WYN9,P62979,A8CGI2,F5GZ39	B2RDW1_HUMAN,RS27A_HUMAN,F5GZ39_HUMAN,Q8WYN9_HUMAN,A8CGI2_HUMAN
9601	PDIA4	IPI00009904	P13667	PDIA4_HUMAN
5034	P4HB	IPI00010796	P07237,B3KTQ9	PDIA1_HUMAN,B3KTQ9_HUMAN
708	C1QBP	IPI00014230	Q07021	C1QBP_HUMAN
10130	PDIA6	IPI00299571	Q15084	PDIA6_HUMAN
65108	MARCKSL1	IPI00641181	P49006	MRP_HUMAN
3326	HSP90AB1	IPI00414676	P08238,A8K3W9	A8K3W9_HUMAN,HS90B_HUMAN
1153	CIRBP	IPI00641579	Q14011	CIRBP_HUMAN
11335	CBX3	IPI00297579	A4D177,C9JMM0,Q13185	CBX3_HUMAN,A4D177_HUMAN,C9JMM0_HUMAN
6418	SET	IPI00072377	Q01105,Q5VXV3,B2REB7	SET_HUMAN,B2REB7_HUMAN,Q5VXV3_HUMAN
3184	HNRNPD	IPI00028888	Q14103,F5H6R6,D6RF44,D6RAF8	HNRPD_HUMAN,D6RF44_HUMAN,D6RAF8_HUMAN,F5H6R6_HUMAN
345651	ACTBL2	IPI00003269	Q562R1	ACTBL_HUMAN
3500	IGHG1	IPI00384938	A8K008,Q5EFE5,Q6GMX6,P01857	A8K008_HUMAN,Q5EFE5_HUMAN,Q6GMX6_HUMAN,IGHG1_HUMAN
7531	YWHAE	IPI00000816	B7ZA86,P62258	B7ZA86_HUMAN,1433E_HUMAN
3178	HNRNPA1	IPI00215965	P09651	ROA1_HUMAN
6421	SFPQ	IPI00010740	P23246,Q9BSV4	SFPQ_HUMAN,Q9BSV4_HUMAN
3185	HNRNPF	IPI00003881	B4DKS8,P52597,Q8NI96	Q8NI96_HUMAN,B4DKS8_HUMAN,HNRPF_HUMAN
1975	EIF4B	IPI00012079	P23588	IF4B_HUMAN
#MonogenicPD
6622	SNCA	-	P37840	SYUA_HUMAN
5071	PARK2	-	O60260	PRKN2_HUMAN
7345	UCHL1	-	P09936	UCHL1_HUMAN
65018	PINK1	-	Q9BXM7	PINK1_HUMAN
11315	PARK7	-	Q99497	PARK7_HUMAN
120892	LRRK2	-	Q5S007	LRRK2_HUMAN
23400	ATP13A2	-	Q9NQ11	AT132_HUMAN
27429	HTRA2	-	O43464	HTRA2_HUMAN
25793	FBXO7	-	Q9Y3I1	FBX7_HUMAN
#Pink1TAP
11140	CDC37	-	Q16543	CDC37_HUMAN
3329	HSPD1	-	P10809	CH60_HUMAN
7284	TUFM	-	P49411	EFTU_HUMAN
3313	HSPA9	-	P38646	GRP75_HUMAN
3309	HSPA5	-	P11021	GRP78_HUMAN
3320	HSP90AA1	-	P07900	HS90A_HUMAN
3326	HSP90AB1	-	P08238	HS90B_HUMAN
3305	HSPA1L	-	P34931	HS71L_HUMAN
3303	HSPA1A,HSPA1B	-	P08107	HSP71_HUMAN
3306	HSPA2	-	P54652	HSP72_HUMAN
3312	HSPA8	-	P11142	HSP7C_HUMAN
10128	LRPPRC	-	P42704	LPPRC_HUMAN
65018	PINK1	-	Q9BXM7	PINK1_HUMAN
1917	EEF1A2	-	Q59GP5	Q59GP5_HUMAN
203068	TUBB	-	Q6LC01	Q6LC01_HUMAN
113457	TUBA3D	-	Q13748	TBA3C_HUMAN
84790	TUBA1C	-	Q9BQE3	TBA1C_HUMAN
#ParkinIP
7283	TUBG1	-	-	-
5335	PLCG1	-	-	-
596	BCL2	-	-	-
9529	BAG5	-	-	-
6853	SYN1	-	-	-
8573	CASK	-	-	-
2861	GPR37	-	-	-
5071	PARK2	-	-	-
4137	MAPT	-	-	-
351	APP	-	-	-
55294	FBXW7	-	-	-
3984	LIMK1	-	-	-
155061	ZNF746	-	-	-
23208	SYT11	-	-	-
5688	PSMA7	-	-	-
7414	VCL	-	-	-
10193	RNF41	-	-	-
5134	PDCD2	-	-	-
1742	DLG4	-	-	-
53347	UBASH3A	-	-	-
284004	HEXDC	-	-	-
55626	AMBRA1	-	-	-
3337	DNAJB1	-	-	-
56901	NDUFA4L2	-	-	-
8454	CUL1	-	-	-
5049	PAFAH1B2	-	-	-
8517	IKBKG	-	-	-
5685	PSMA4	-	-	-
2060	EPS15	-	-	-
9804	TOMM20	-	-	-
3308	HSPA4	-	-	-
9627	SNCAIP	-	-	-
27429	HTRA2	-	-	-
9927	MFN2	-	-	-
571	BACH1	-	-	-
9246	UBE2L6	-	-	-
6493	SIM2	-	-	-
6531	SLC6A3	-	-	-
3312	HSPA8	-	-	-
7846	TUBA1A	-	-	-
1020	CDK5	-	-	-
11315	PARK7	-	-	-
3304	HSPA1B	-	-	-
2904	GRIN2B	-	-	-
120892	LRRK2	-	-	-
25	ABL1	-	-	-
9759	HDAC4	-	-	-
7326	UBE2G1	-	-	-
9456	HOMER1	-	-	-
65018	PINK1	-	-	-
9463	PICK1	-	-	-
9319	TRIP13	-	-	-
2033	EP300	-	-	-
898	CCNE1	-	-	-
10273	STUB1	-	-	-
8900	CCNA1	-	-	-
84959	UBASH3B	-	-	-
7186	TRAF2	-	-	-
55669	MFN1	-	-	-
5997	RGS2	-	-	-
5682	PSMA1	-	-	-
7316	UBC	-	-	-
6622	SNCA	-	-	-
7332	UBE2L3	-	-	-
815	CAMK2A	-	-	-
7314	UBB	-	-	-
5705	PSMC5	-	-	-
5903	RANBP2	-	-	-
3303	HSPA1A	-	-	-
5879	RAC1	-	-	-
5810	RAD1	-	-	-
5413	SEPT5	-	-	-
3301	DNAJA1	-	-	-
51465	UBE2J1	-	-	-
2203	FBP1	-	-	-
7965	AIMP2	-	-	-
4891	SLC11A2	-	-	-
#MonogenicPDIP
9092	SART1	-	-	-
5121	PCP4	-	-	-
1457	CSNK2A1	-	-	-
23513	SCRIB	-	-	-
5478	PPIA	-	-	-
79068	FTO	-	-	-
5691	PSMB3	-	-	-
54205	CYCS	-	-	-
23234	DNAJC9	-	-	-
10435	CDC42EP2	-	-	-
1938	EEF2	-	-	-
8487	GEMIN2	-	-	-
793	CALB1	-	-	-
5250	SLC25A3	-	-	-
8450	CUL4B	-	-	-
9684	LRRC14	-	-	-
64963	MRPS11	-	-	-
60	ACTB	-	-	-
6526	SLC5A3	-	-	-
6801	STRN	-	-	-
5230	PGK1	-	-	-
5905	RANGAP1	-	-	-
4898	NRD1	-	-	-
3281	HSBP1	-	-	-
10165	SLC25A13	-	-	-
10131	TRAP1	-	-	-
29927	SEC61A1	-	-	-
64975	MRPL41	-	-	-
55643	BTBD2	-	-	-
1108	CHD4	-	-	-
9611	NCOR1	-	-	-
159963	SLC5A12	-	-	-
7283	TUBG1	-	-	-
4747	NEFL	-	-	-
9479	MAPK8IP1	-	-	-
5836	PYGL	-	-	-
22919	MAPRE1	-	-	-
5335	PLCG1	-	-	-
10048	RANBP9	-	-	-
150678	MYEOV2	-	-	-
596	BCL2	-	-	-
3310	HSPA6	-	-	-
26232	FBXO2	-	-	-
56924	PAK6	-	-	-
6624	FSCN1	-	-	-
79718	TBL1XR1	-	-	-
9529	BAG5	-	-	-
10116	FEM1B	-	-	-
6510	SLC1A5	-	-	-
5955	RCN2	-	-	-
2039	EPB49	-	-	-
79699	ZYG11B	-	-	-
55763	EXOC1	-	-	-
57459	GATAD2B	-	-	-
552900	BOLA2B	-	-	-
57542	KLHDC5	-	-	-
654790	PCP4L1	-	-	-
6853	SYN1	-	-	-
57062	DDX24	-	-	-
9113	LATS1	-	-	-
1500	CTNND1	-	-	-
7879	RAB7A	-	-	-
8573	CASK	-	-	-
582	BBS1	-	-	-
367	AR	-	-	-
2861	GPR37	-	-	-
6949	TCOF1	-	-	-
8764	TNFRSF14	-	-	-
85476	GFM1	-	-	-
5689	PSMB1	-	-	-
5071	PARK2	-	-	-
8658	TNKS	-	-	-
55898	UNC45A	-	-	-
79016	DDA1	-	-	-
226	ALDOA	-	-	-
4137	MAPT	-	-	-
1399	CRKL	-	-	-
84464	SLX4	-	-	-
51138	COPS4	-	-	-
84261	FBXW9	-	-	-
51260	CXorf26	-	-	-
26047	CNTNAP2	-	-	-
64770	CCDC14	-	-	-
10987	COPS5	-	-	-
50813	COPS7A	-	-	-
50628	GEMIN4	-	-	-
2517	FUCA1	-	-	-
29086	BABAM1	-	-	-
2000	ELF4	-	-	-
22894	DIS3	-	-	-
654483	BOLA2B	-	-	-
156	ADRBK1	-	-	-
2002	ELK1	-	-	-
351	APP	-	-	-
4139	MARK1	-	-	-
51366	UBR5	-	-	-
27183	VPS4A	-	-	-
4209	MEF2D	-	-	-
2185	PTK2B	-	-	-
55294	FBXW7	-	-	-
1476	CSTB	-	-	-
55844	PPP2R2D	-	-	-
23132	RAD54L2	-	-	-
55176	SEC61A2	-	-	-
54460	MRPS21	-	-	-
5414	SEPT4	-	-	-
60496	AASDHPPT	-	-	-
84896	ATAD1	-	-	-
3984	LIMK1	-	-	-
3054	HCFC1	-	-	-
155061	ZNF746	-	-	-
8471	IRS4	-	-	-
1432	MAPK14	-	-	-
1410	CRYAB	-	-	-
23382	AHCYL2	-	-	-
6500	SKP1	-	-	-
10423	CDIPT	-	-	-
3315	HSPB1	-	-	-
1616	DAXX	-	-	-
23208	SYT11	-	-	-
4605	MYBL2	-	-	-
2802	GOLGA3	-	-	-
51552	RAB14	-	-	-
5653	KLK6	-	-	-
51133	KCTD3	-	-	-
3219	HOXB9	-	-	-
65109	UPF3B	-	-	-
83699	SH3BGRL2	-	-	-
29110	TBK1	-	-	-
163859	C1orf55	-	-	-
388698	FLG2	-	-	-
84142	FAM175A	-	-	-
4738	NEDD8	-	-	-
8479	HIRIP3	-	-	-
4712	NDUFB6	-	-	-
2774	GNAL	-	-	-
1875	E2F5	-	-	-
5688	PSMA7	-	-	-
7414	VCL	-	-	-
8655	DYNLL1	-	-	-
84196	USP48	-	-	-
5860	QDPR	-	-	-
5223	PGAM1	-	-	-
10128	LRPPRC	-	-	-
23511	NUP188	-	-	-
6472	SHMT2	-	-	-
2670	GFAP	-	-	-
23092	ARHGAP26	-	-	-
7335	UBE2V1	-	-	-
10193	RNF41	-	-	-
5134	PDCD2	-	-	-
4641	MYO1C	-	-	-
1742	DLG4	-	-	-
2011	MARK2	-	-	-
6607	SMN2	-	-	-
53347	UBASH3A	-	-	-
84861	KLHL22	-	-	-
284004	HEXDC	-	-	-
1915	EEF1A1	-	-	-
9112	MTA1	-	-	-
8717	TRADD	-	-	-
160287	LDHAL6A	-	-	-
58472	SQRDL	-	-	-
56257	MEPCE	-	-	-
26057	ANKRD17	-	-	-
5048	PAFAH1B1	-	-	-
3225	HOXC9	-	-	-
10609	LEPREL4	-	-	-
8427	ZNF282	-	-	-
8682	PEA15	-	-	-
2199	FBLN2	-	-	-
65005	MRPL9	-	-	-
7257	TSNAX	-	-	-
55626	AMBRA1	-	-	-
5928	RBBP4	-	-	-
5522	PPP2R2C	-	-	-
10393	ANAPC10	-	-	-
2987	GUK1	-	-	-
92799	SHKBP1	-	-	-
5594	MAPK1	-	-	-
162	AP1B1	-	-	-
57448	BIRC6	-	-	-
330	BIRC3	-	-	-
26121	PRPF31	-	-	-
79444	BIRC7	-	-	-
4514	MT-CO3	-	-	-
3337	DNAJB1	-	-	-
51720	UIMC1	-	-	-
5534	PPP3R1	-	-	-
10627	MYL12A	-	-	-
56901	NDUFA4L2	-	-	-
1453	CSNK1D	-	-	-
5519	PPP2R1B	-	-	-
2597	GAPDH	-	-	-
2869	GRK5	-	-	-
1019	CDK4	-	-	-
1759	DNM1	-	-	-
1106	CHD2	-	-	-
1956	EGFR	-	-	-
114781	BTBD9	-	-	-
203068	TUBB	-	-	-
2944	GSTM1	-	-	-
308	ANXA5	-	-	-
7345	UCHL1	-	-	-
8841	HDAC3	-	-	-
9491	PSMF1	-	-	-
79008	SLX1B	-	-	-
5584	PRKCI	-	-	-
8454	CUL1	-	-	-
5049	PAFAH1B2	-	-	-
8517	IKBKG	-	-	-
7157	TP53	-	-	-
150709	ANKAR	-	-	-
9525	VPS4B	-	-	-
92675	DTD1	-	-	-
8878	SQSTM1	-	-	-
841	CASP8	-	-	-
4015	LOX	-	-	-
1643	DDB2	-	-	-
7329	UBE2I	-	-	-
84188	FAR1	-	-	-
6606	SMN2	-	-	-
302	ANXA2	-	-	-
2873	GPS1	-	-	-
9921	RNF10	-	-	-
5685	PSMA4	-	-	-
11344	TWF2	-	-	-
27005	USP21	-	-	-
3200	HOXA3	-	-	-
5686	PSMA5	-	-	-
26059	ERC2	-	-	-
10289	EIF1B	-	-	-
51514	DTL	-	-	-
5586	PKN2	-	-	-
5695	PSMB7	-	-	-
10921	RNPS1	-	-	-
6647	SOD1	-	-	-
11021	RAB35	-	-	-
84306	PDCD2L	-	-	-
3872	KRT17	-	-	-
122769	LRR1	-	-	-
7431	VIM	-	-	-
2060	EPS15	-	-	-
80311	KLHL15	-	-	-
55291	PPP6R3	-	-	-
2027	ENO3	-	-	-
5358	PLS3	-	-	-
9804	TOMM20	-	-	-
3030	HADHA	-	-	-
7347	UCHL3	-	-	-
8879	SGPL1	-	-	-
3329	HSPD1	-	-	-
801	CALM1	-	-	-
3032	HADHB	-	-	-
30012	TLX3	-	-	-
3692	EIF6	-	-	-
3308	HSPA4	-	-	-
10381	TUBB3	-	-	-
4673	NAP1L1	-	-	-
3181	HNRNPA2B1	-	-	-
9474	ATG5	-	-	-
9627	SNCAIP	-	-	-
5518	PPP2R1A	-	-	-
2010	EMD	-	-	-
115290	SARS2	-	-	-
9978	RBX1	-	-	-
7277	TUBA4A	-	-	-
22906	TRAK1	-	-	-
51094	ADIPOR1	-	-	-
27429	HTRA2	-	-	-
7458	EIF4H	-	-	-
9927	MFN2	-	-	-
27252	KLHL20	-	-	-
1460	CSNK2B	-	-	-
7529	YWHAB	-	-	-
10367	MICU1	-	-	-
1828	DSG1	-	-	-
57563	KLHL8	-	-	-
5529	PPP2R5E	-	-	-
7167	TPI1	-	-	-
36	ACADSB	-	-	-
1111	CHEK1	-	-	-
2268	FGR	-	-	-
1027	CDKN1B	-	-	-
5300	PIN1	-	-	-
8766	RAB11A	-	-	-
23710	GABARAPL1	-	-	-
246176	GAS2L2	-	-	-
571	BACH1	-	-	-
9246	UBE2L6	-	-	-
10376	TUBA1B	-	-	-
6493	SIM2	-	-	-
6531	SLC6A3	-	-	-
9219	MTA2	-	-	-
3396	ICT1	-	-	-
84461	NEURL4	-	-	-
23534	TNPO3	-	-	-
202051	SPATA24	-	-	-
23172	FAM175B	-	-	-
83716	CRISPLD2	-	-	-
9882	TBC1D4	-	-	-
136306	SVOPL	-	-	-
90293	KLHL13	-	-	-
5515	PPP2CA	-	-	-
51185	CRBN	-	-	-
3312	HSPA8	-	-	-
7846	TUBA1A	-	-	-
146057	TTBK2	-	-	-
8294	HIST4H4	-	-	-
1020	CDK5	-	-	-
8533	COPS3	-	-	-
23576	DDAH1	-	-	-
84674	CARD6	-	-	-
11315	PARK7	-	-	-
1891	ECH1	-	-	-
2665	GDI2	-	-	-
5599	MAPK8	-	-	-
7029	TFDP2	-	-	-
8801	SUCLG2	-	-	-
26094	DCAF4	-	-	-
54948	MRPL16	-	-	-
10054	UBA2	-	-	-
29088	MRPL15	-	-	-
55757	UGGT2	-	-	-
51184	GPN3	-	-	-
3065	HDAC1	-	-	-
11165	NUDT3	-	-	-
25824	PRDX5	-	-	-
5781	PTPN11	-	-	-
5683	PSMA2	-	-	-
60412	EXOC4	-	-	-
1163	CKS1B	-	-	-
10240	MRPS31	-	-	-
5226	PGD	-	-	-
7159	TP53BP2	-	-	-
3861	KRT14	-	-	-
4163	MCC	-	-	-
54865	GPATCH4	-	-	-
55957	LIN37	-	-	-
4131	MAP1B	-	-	-
3304	HSPA1B	-	-	-
7402	UTRN	-	-	-
63893	UBE2O	-	-	-
11076	TPPP	-	-	-
8772	FADD	-	-	-
805	CALM3	-	-	-
2318	FLNC	-	-	-
2904	GRIN2B	-	-	-
120892	LRRK2	-	-	-
22931	RAB18	-	-	-
25793	FBXO7	-	-	-
1021	CDK6	-	-	-
22801	ITGA11	-	-	-
25	ABL1	-	-	-
7057	THBS1	-	-	-
9833	MELK	-	-	-
3720	JARID2	-	-	-
11215	AKAP11	-	-	-
2316	FLNA	-	-	-
89910	UBE3B	-	-	-
1213	CLTC	-	-	-
8402	SLC25A11	-	-	-
896	CCND3	-	-	-
117159	DCD	-	-	-
6709	SPTAN1	-	-	-
8443	GNPAT	-	-	-
4282	MIF	-	-	-
9759	HDAC4	-	-	-
7326	UBE2G1	-	-	-
5019	OXCT1	-	-	-
129831	RBM45	-	-	-
8065	CUL5	-	-	-
10380	BPNT1	-	-	-
6921	TCEB1	-	-	-
26046	LTN1	-	-	-
6181	RPLP2	-	-	-
3920	LAMP2	-	-	-
7083	TK1	-	-	-
23136	EPB41L3	-	-	-
80204	FBXO11	-	-	-
79184	BRCC3	-	-	-
8678	BECN1	-	-	-
6238	RRBP1	-	-	-
213	ALB	-	-	-
3376	IARS	-	-	-
7534	YWHAZ	-	-	-
10611	PDLIM5	-	-	-
2803	GOLGA4	-	-	-
11116	FGFR1OP	-	-	-
7874	USP7	-	-	-
9577	BRE	-	-	-
3727	JUND	-	-	-
9456	HOMER1	-	-	-
3313	HSPA9	-	-	-
5861	RAB1A	-	-	-
54800	KLHL24	-	-	-
10868	USP20	-	-	-
65018	PINK1	-	-	-
9463	PICK1	-	-	-
6620	SNCB	-	-	-
51444	RNF138	-	-	-
6737	TRIM21	-	-	-
444	ASPH	-	-	-
5052	PRDX1	-	-	-
9319	TRIP13	-	-	-
7374	UNG	-	-	-
53615	MBD3	-	-	-
23345	SYNE1	-	-	-
813	CALU	-	-	-
2017	CTTN	-	-	-
4869	NPM1	-	-	-
10944	C11orf58	-	-	-
55227	LRRC1	-	-	-
4099	MAG	-	-	-
5693	PSMB5	-	-	-
595	CCND1	-	-	-
818	CAMK2G	-	-	-
1161	ERCC8	-	-	-
1861	TOR1A	-	-	-
2033	EP300	-	-	-
57470	LRRC47	-	-	-
64708	COPS7B	-	-	-
84617	TUBB6	-	-	-
331	XIAP	-	-	-
56616	DIABLO	-	-	-
898	CCNE1	-	-	-
125228	C18orf19	-	-	-
3320	HSP90AA1	-	-	-
55161	TMEM33	-	-	-
2997	GYS1	-	-	-
55968	NSFL1C	-	-	-
10980	COPS6	-	-	-
57673	BEND3	-	-	-
121642	ALKBH2	-	-	-
3039	HBA2	-	-	-
4481	MSR1	-	-	-
89941	RHOT2	-	-	-
7322	UBE2D2	-	-	-
10273	STUB1	-	-	-
4190	MDH1	-	-	-
113174	SAAL1	-	-	-
11060	WWP2	-	-	-
5694	PSMB6	-	-	-
5728	PTEN	-	-	-
5160	PDHA1	-	-	-
8453	CUL2	-	-	-
8900	CCNA1	-	-	-
64800	EFCAB6	-	-	-
9787	DLGAP5	-	-	-
4741	NEFM	-	-	-
93611	FBXO44	-	-	-
84959	UBASH3B	-	-	-
4627	MYH9	-	-	-
3066	HDAC2	-	-	-
4735	SEPT2	-	-	-
7416	VDAC1	-	-	-
7186	TRAF2	-	-	-
567	B2M	-	-	-
5830	PEX5	-	-	-
498	ATP5A1	-	-	-
55669	MFN1	-	-	-
163590	TOR1AIP2	-	-	-
5997	RGS2	-	-	-
7189	TRAF6	-	-	-
5682	PSMA1	-	-	-
10241	CALCOCO2	-	-	-
3851	KRT4	-	-	-
10920	COPS8	-	-	-
3163	HMOX2	-	-	-
7027	TFDP1	-	-	-
1874	E2F4	-	-	-
128239	IQGAP3	-	-	-
7316	UBC	-	-	-
51035	UBXN1	-	-	-
5930	RBBP6	-	-	-
286826	LIN9	-	-	-
10845	CLPX	-	-	-
7054	TH	-	-	-
100287932	TIMM23	-	-	-
84340	GFM2	-	-	-
23770	FKBP8	-	-	-
132660	LIN54	-	-	-
80011	FAM192A	-	-	-
2870	GRK6	-	-	-
1447	CSN2	-	-	-
55824	PAG1	-	-	-
1762	DMWD	-	-	-
10602	CDC42EP3	-	-	-
80344	DCAF11	-	-	-
9641	IKBKE	-	-	-
142	PARP1	-	-	-
5571	PRKAG1	-	-	-
57179	KIAA1191	-	-	-
79876	UBA5	-	-	-
6622	SNCA	-	-	-
378	ARF4	-	-	-
5690	PSMB2	-	-	-
7332	UBE2L3	-	-	-
80184	CEP290	-	-	-
84790	TUBA1C	-	-	-
8359	HIST4H4	-	-	-
1152	CKB	-	-	-
5595	MAPK3	-	-	-
815	CAMK2A	-	-	-
7314	UBB	-	-	-
8924	HERC2	-	-	-
51503	CWC15	-	-	-
51079	NDUFA13	-	-	-
5309	PITX3	-	-	-
2887	GRB10	-	-	-
81570	CLPB	-	-	-
5684	PSMA3	-	-	-
1159	CKMT1B	-	-	-
9318	COPS2	-	-	-
3309	HSPA5	-	-	-
25942	SIN3A	-	-	-
572	BAD	-	-	-
3040	HBA2	-	-	-
10383	TUBB4B	-	-	-
10877	CFHR4	-	-	-
581	BAX	-	-	-
6176	RPLP1	-	-	-
4904	YBX1	-	-	-
53339	BTBD1	-	-	-
9063	PIAS2	-	-	-
10951	CBX1	-	-	-
85440	DOCK7	-	-	-
9709	HERPUD1	-	-	-
9919	SEC16A	-	-	-
6011	GRK1	-	-	-
5436	POLR2G	-	-	-
8451	CUL4A	-	-	-
6711	SPTBN1	-	-	-
548596	CKMT1B	-	-	-
5337	PLD1	-	-	-
548593	SLX1B	-	-	-
23001	WDFY3	-	-	-
4155	MBP	-	-	-
5705	PSMC5	-	-	-
10056	FARSB	-	-	-
4140	MARK3	-	-	-
5903	RANBP2	-	-	-
6278	S100A7	-	-	-
6812	STXBP1	-	-	-
10010	TANK	-	-	-
7001	PRDX2	-	-	-
347688	-	-	-	-
10243	GPHN	-	-	-
1434	CSE1L	-	-	-
1266	CNN3	-	-	-
5063	PAK3	-	-	-
2271	FH	-	-	-
56957	OTUD7B	-	-	-
55843	ARHGAP15	-	-	-
91750	LIN52	-	-	-
91614	DEPDC7	-	-	-
3575	IL7R	-	-	-
5898	RALA	-	-	-
84706	GPT2	-	-	-
269	AMHR2	-	-	-
81892	SLIRP	-	-	-
3303	HSPA1A	-	-	-
871	SERPINH1	-	-	-
3093	UBE2K	-	-	-
5496	PPM1G	-	-	-
9501	RPH3AL	-	-	-
5520	PPP2R2A	-	-	-
5931	RBBP7	-	-	-
83729	INHBE	-	-	-
1832	DSP	-	-	-
1984	EIF5A	-	-	-
119559	SFXN4	-	-	-
10985	GCN1L1	-	-	-
6502	SKP2	-	-	-
8452	CUL3	-	-	-
5687	PSMA6	-	-	-
65080	MRPL44	-	-	-
55803	ADAP2	-	-	-
23043	TNIK	-	-	-
5934	RBL2	-	-	-
9688	NUP93	-	-	-
3326	HSP90AB1	-	-	-
2622	GAS8	-	-	-
5906	RAP1A	-	-	-
5479	PPIB	-	-	-
81631	MAP1LC3B	-	-	-
1808	DPYSL2	-	-	-
84570	COL25A1	-	-	-
7428	VHL	-	-	-
6844	VAMP2	-	-	-
4905	NSF	-	-	-
29895	MYLPF	-	-	-
51021	MRPS16	-	-	-
8833	GMPS	-	-	-
2770	GNAI1	-	-	-
51719	CAB39	-	-	-
285	ANGPT2	-	-	-
11333	PDAP1	-	-	-
6522	SLC4A2	-	-	-
2932	GSK3B	-	-	-
4603	MYBL1	-	-	-
6726	SRP9	-	-	-
5879	RAC1	-	-	-
56882	CDC42SE1	-	-	-
4172	MCM3	-	-	-
254251	LCORL	-	-	-
9657	IQCB1	-	-	-
25981	DNAH1	-	-	-
55958	KLHL9	-	-	-
329	BIRC2	-	-	-
7280	TUBB2A	-	-	-
5581	PRKCE	-	-	-
11140	CDC37	-	-	-
26263	FBXO22	-	-	-
5608	MAP2K6	-	-	-
2239	GPC4	-	-	-
7385	UQCRC2	-	-	-
83985	SPNS1	-	-	-
5810	RAD1	-	-	-
79443	FYCO1	-	-	-
9968	MED12	-	-	-
5413	SEPT5	-	-	-
23170	TTLL12	-	-	-
3301	DNAJA1	-	-	-
1459	CSNK2A2	-	-	-
1158	CKM	-	-	-
2664	GDI1	-	-	-
9939	RBM8A	-	-	-
6050	RNH1	-	-	-
322	APBB1	-	-	-
2534	FYN	-	-	-
5784	PTPN14	-	-	-
5347	PLK1	-	-	-
64067	NPAS3	-	-	-
115827	RAB3C	-	-	-
1446	CSN1S1	-	-	-
51465	UBE2J1	-	-	-
2203	FBP1	-	-	-
534	ATP6V1G2	-	-	-
51574	LARP7	-	-	-
388697	HRNR	-	-	-
11260	XPOT	-	-	-
5591	PRKDC	-	-	-
23243	ANKRD28	-	-	-
10869	USP19	-	-	-
4698	NDUFA5	-	-	-
7417	VDAC2	-	-	-
10533	ATG7	-	-	-
23598	PATZ1	-	-	-
6478	SIAH2	-	-	-
983	CDK1	-	-	-
116540	MRPL53	-	-	-
10815	CPLX1	-	-	-
7965	AIMP2	-	-	-
476	ATP1A1	-	-	-
23279	NUP160	-	-	-
58477	SRPRB	-	-	-
54947	LPCAT2	-	-	-
4891	SLC11A2	-	-	-
1499	CTNNB1	-	-	-
29966	STRN3	-	-	-
5037	PEBP1	-	-	-
6477	SIAH1	-	-	-
997	CDC34	-	-	-
4217	MAP3K5	-	-	-
3185	HNRNPF	-	-	-
5202	PFDN2	-	-	-
9730	VPRBP	-	-	-
#Pink1IP
1457	CSNK2A1	-	-	-
10131	TRAP1	-	-	-
159963	SLC5A12	-	-	-
56924	PAK6	-	-	-
5071	PARK2	-	-	-
1399	CRKL	-	-	-
8471	IRS4	-	-	-
23092	ARHGAP26	-	-	-
10609	LEPREL4	-	-	-
2199	FBLN2	-	-	-
3200	HOXA3	-	-	-
5586	PKN2	-	-	-
9804	TOMM20	-	-	-
30012	TLX3	-	-	-
22906	TRAK1	-	-	-
51094	ADIPOR1	-	-	-
246176	GAS2L2	-	-	-
146057	TTBK2	-	-	-
84674	CARD6	-	-	-
11315	PARK7	-	-	-
7159	TP53BP2	-	-	-
3861	KRT14	-	-	-
3720	JARID2	-	-	-
8678	BECN1	-	-	-
10611	PDLIM5	-	-	-
65018	PINK1	-	-	-
23345	SYNE1	-	-	-
89941	RHOT2	-	-	-
11060	WWP2	-	-	-
5728	PTEN	-	-	-
7316	UBC	-	-	-
5930	RBBP6	-	-	-
10877	CFHR4	-	-	-
269	AMHR2	-	-	-
9501	RPH3AL	-	-	-
5931	RBBP7	-	-	-
83729	INHBE	-	-	-
81631	MAP1LC3B	-	-	-
254251	LCORL	-	-	-
5608	MAP2K6	-	-	-
9968	MED12	-	-	-
5784	PTPN14	-	-	-
64067	NPAS3	-	-	-
23598	PATZ1	-	-	-
#RelatedPD
7283	TUBG1	-	-	-
5335	PLCG1	-	-	-
596	BCL2	-	-	-
9529	BAG5	-	-	-
6853	SYN1	-	-	-
8573	CASK	-	-	-
2861	GPR37	-	-	-
5071	PARK2	-	-	-
4137	MAPT	-	-	-
351	APP	-	-	-
55294	FBXW7	-	-	-
3984	LIMK1	-	-	-
155061	ZNF746	-	-	-
23208	SYT11	-	-	-
5688	PSMA7	-	-	-
7414	VCL	-	-	-
10193	RNF41	-	-	-
5134	PDCD2	-	-	-
1742	DLG4	-	-	-
53347	UBASH3A	-	-	-
284004	HEXDC	-	-	-
55626	AMBRA1	-	-	-
3337	DNAJB1	-	-	-
56901	NDUFA4L2	-	-	-
8454	CUL1	-	-	-
5049	PAFAH1B2	-	-	-
8517	IKBKG	-	-	-
5685	PSMA4	-	-	-
2060	EPS15	-	-	-
9804	TOMM20	-	-	-
3308	HSPA4	-	-	-
9627	SNCAIP	-	-	-
27429	HTRA2	-	-	-
9927	MFN2	-	-	-
571	BACH1	-	-	-
9246	UBE2L6	-	-	-
6493	SIM2	-	-	-
6531	SLC6A3	-	-	-
3312	HSPA8	-	-	-
7846	TUBA1A	-	-	-
1020	CDK5	-	-	-
11315	PARK7	-	-	-
3304	HSPA1B	-	-	-
2904	GRIN2B	-	-	-
120892	LRRK2	-	-	-
25	ABL1	-	-	-
9759	HDAC4	-	-	-
7326	UBE2G1	-	-	-
9456	HOMER1	-	-	-
65018	PINK1	-	-	-
9463	PICK1	-	-	-
9319	TRIP13	-	-	-
2033	EP300	-	-	-
898	CCNE1	-	-	-
10273	STUB1	-	-	-
8900	CCNA1	-	-	-
84959	UBASH3B	-	-	-
7186	TRAF2	-	-	-
55669	MFN1	-	-	-
5997	RGS2	-	-	-
5682	PSMA1	-	-	-
7316	UBC	-	-	-
6622	SNCA	-	-	-
7332	UBE2L3	-	-	-
815	CAMK2A	-	-	-
7314	UBB	-	-	-
5705	PSMC5	-	-	-
5903	RANBP2	-	-	-
3303	HSPA1A	-	-	-
5879	RAC1	-	-	-
5810	RAD1	-	-	-
5413	SEPT5	-	-	-
3301	DNAJA1	-	-	-
51465	UBE2J1	-	-	-
2203	FBP1	-	-	-
7965	AIMP2	-	-	-
4891	SLC11A2	-	-	-
7345	UCHL1	-	-	-
23400	ATP13A2	-	-	-
25793	FBXO7	-	-	-
#ParkinTAP∩ParkinIP
3312	HSPA8	-	-	-
3301	DNAJA1	-	-	-
5071	PARK2	-	-	-
3303	HSPA1A	-	-	-
#ParkinTAP∩MonogenicPD
5071	PARK2	-	-	-
#ParkinTAP∩MonogenicPDIP
3312	HSPA8	-	-	-
5071	PARK2	-	-	-
3329	HSPD1	-	-	-
3326	HSP90AB1	-	-	-
3032	HADHB	-	-	-
4869	NPM1	-	-	-
9939	RBM8A	-	-	-
9092	SART1	-	-	-
60	ACTB	-	-	-
10627	MYL12A	-	-	-
84790	TUBA1C	-	-	-
7277	TUBA4A	-	-	-
801	CALM1	-	-	-
3185	HNRNPF	-	-	-
213	ALB	-	-	-
10383	TUBB4B	-	-	-
5052	PRDX1	-	-	-
3181	HNRNPA2B1	-	-	-
3309	HSPA5	-	-	-
1915	EEF1A1	-	-	-
302	ANXA2	-	-	-
7431	VIM	-	-	-
10165	SLC25A13	-	-	-
3303	HSPA1A	-	-	-
2597	GAPDH	-	-	-
10951	CBX1	-	-	-
10845	CLPX	-	-	-
5250	SLC25A3	-	-	-
3313	HSPA9	-	-	-
84617	TUBB6	-	-	-
4741	NEFM	-	-	-
10128	LRPPRC	-	-	-
498	ATP5A1	-	-	-
5955	RCN2	-	-	-
3301	DNAJA1	-	-	-
10240	MRPS31	-	-	-
203068	TUBB	-	-	-
3320	HSP90AA1	-	-	-
813	CALU	-	-	-
4747	NEFL	-	-	-
#ParkinTAP∩Pink1TAP
3312	HSPA8	-	-	-
10128	LRPPRC	-	-	-
7284	TUFM	-	-	-
3329	HSPD1	-	-	-
3303	HSPA1A	-	-	-
3309	HSPA5	-	-	-
113457	TUBA3D	-	-	-
84790	TUBA1C	-	-	-
1917	EEF1A2	-	-	-
3320	HSP90AA1	-	-	-
3306	HSPA2	-	-	-
3305	HSPA1L	-	-	-
3313	HSPA9	-	-	-
203068	TUBB	-	-	-
3326	HSP90AB1	-	-	-
#ParkinIP∩MonogenicPD
11315	PARK7	-	-	-
27429	HTRA2	-	-	-
6622	SNCA	-	-	-
120892	LRRK2	-	-	-
65018	PINK1	-	-	-
5071	PARK2	-	-	-
